# Supplementary material
Source: ML conference proceedings conference paper supplement (https://openaccess.thecvf.com/content/WACV_2020/html/Sharma_Scale-aware_Conditional_Generative_WACV_2020_paper.html)
Supplement: Supplementary file 1 [file Sharma_Scale-aware_Conditional_Generative_WACV_2020_supplemental.pdf]

Archive with 1 entries (1 files):
- 173-supp.pdf
