# Supplementary material
Source: ML conference proceedings conference paper supplement (https://openaccess.thecvf.com/content/WACV_2020/html/Sharma_Scale-aware_Conditional_Generative_WACV_2020_paper.html)
Supplement: Supplementary file 1 [file Sharma_Scale-aware_Conditional_Generative_WACV_2020_supplemental.pdf › 173-supp.pdf]

# Scale-aware Conditional Generative Adversarial Network for Image Dehazing

-Supplementary Material-

## Abstract

This supplementary material consists of following items:

- Training and data augmentation pipeline.
- More LoGs of the images.
- Difference between Gradient and LoG losses.
- Details of the adopted evaluation metrics.
- Qualitative results of ablation study.
- [Figure of merit \(fom\)](#)
- More synthetic results on SOTS.
- More real-world results.

---

**Algorithm 1** Data augmentation pipeline for proposed method

---

**Require:** Paired training dataset  $\{(\mathbf{I}, \mathbf{J})\}_{l=1}^T$   
**Require:** Augmentation probabilities  $P_{\text{hfp}} = P_{\text{vfp}} = P_{\text{rcp}} = P_{\text{dat}} = P_{\text{rot}} = 0.5$  and  $N_{\text{epoch}} = 104$ .

```

1: for  $n = 1, \dots, N_{\text{epoch}}$  do
2:   for  $l = 1, \dots, T$  do
3:      $P \leftarrow \text{get\_pair}(\mathbf{I}, \mathbf{J})$ 
4:      $r \leftarrow \text{random}(0, 1)$ 
5:     if  $r < P_{\text{dat}}$  then
6:        $t_1 \leftarrow \text{horizontal\_flip}(P_{\text{hfp}})$ 
7:        $t_2 \leftarrow \text{vertical\_flip}(P_{\text{vfp}})$ 
8:        $T \leftarrow \text{randomly\_one}(t_1, t_2)$ 
9:        $T_{\text{rot}} \leftarrow \text{rotation}(P_{\text{rot}})$ 
10:       $T_{\text{rcp}} \leftarrow \text{crop}(P_{\text{rcp}})$ 
11:       $S \leftarrow \text{shuffle}(\{T_{\text{rot}}, T, T_{\text{rcp}}\})$ 
12:       $P^{\text{new}} \leftarrow S(P)$ 
13:      perform\_training( $P^{\text{new}}$ )
14:    else perform\_training( $P$ )
15:    end if
16:  end for
17: end for

```

---

## 1. Training and data augmentation pipeline

Algorithm 1, 2 presents brief steps of data augmentation and training pipelines of the proposed framework for the problem of single image de-hazing.

---

**Algorithm 2** Training pipeline for proposed method

---

**Require:** Paired training dataset  $\{(\mathbf{I}, \mathbf{J})\}_{l=1}^T$   
**Require:** Number of training epochs  $N_{\text{epoch}} = 104$ , number of training iterations for generator  $N_G = 1$  and  $\lambda_E = \lambda_A = \lambda_P = \lambda_G = 1, \lambda_D = 0.5$   
**Require:** Load pretrained VGG-16 (V) network parameters  
**Initialize:** Weight parameters of generator and discriminator  $\theta_G, \theta_D$

```

1: for  $n = 1, \dots, N_{\text{epoch}}$  do
2:   for  $l = 1, \dots, T$  do
3:     for  $t = 1, \dots, N_G$  do
4:        $\#g_A$  is gradient obtained by using  $L_A$ 
5:        $\#g_P$  is gradient obtained by using  $L_P$ 
6:        $\#g_E$  is gradient obtained by using  $L_E$ 
7:        $\#g_G$  is gradient obtained by using  $L_{\text{LoG}}$ 
8:        $L_A \leftarrow -\sum \log(\phi_D(\phi_G(\mathbf{I}_i)))$ 
9:        $g_A \leftarrow \nabla_{\theta_G} \lambda_A L_A$ 
10:       $L_P \leftarrow \sum_{c_i, w_i, h_i} \|V(\phi_G(\mathbf{I})) - V(\mathbf{J})\|_2^2$ 
11:       $g_P \leftarrow \nabla_{\theta_G} \lambda_P L_P$ 
12:       $L_E \leftarrow \sum_{c_i, w_i, h_i} \|\phi_G(\mathbf{I}) - \mathbf{J}\|_2^2$ 
13:       $g_E \leftarrow \nabla_{\theta_G} \lambda_E L_E$ 
14:       $L_{\text{LoG}} \leftarrow \sum_{c_i, w_i, h_i} \|\mathbf{L}(\phi_G(\mathbf{I})) - \mathbf{L}(\mathbf{J})\|_2^2$ 
15:       $g_{\text{LoG}} \leftarrow \nabla_{\theta_G} \lambda_G L_{\text{LoG}}$ 
16:       $\theta_G \leftarrow \theta_G - \sum_{y=\{g_A, g_P, g_E, g_{\text{LoG}}\}} y$ 
17:    end for
18:     $\mathcal{L}_{\text{Real}} \leftarrow \lambda_D \log(\phi_D(\mathbf{J}))$ 
19:     $g_r \leftarrow \nabla_{\theta_D} \lambda_D \mathcal{L}_{\text{Real}}$ 
20:     $\mathcal{L}_{\text{Fake}} \leftarrow \lambda_D \log(1 - \phi_D(\phi_G(\mathbf{I})))$ 
21:     $g_f \leftarrow \nabla_{\theta_D} \lambda_D \mathcal{L}_{\text{Fake}}$ 
22:     $\theta_D \leftarrow \theta_D + [g_r + g_f]$ 
23:  end for
24: end for

```

---

## 2. More LoGs of the images

Figures 1, 2, 3, 4, and 5 present more samples demonstrating the comparison between Laplacians of Gaussian (LoG) of existing methods and proposed scheme.

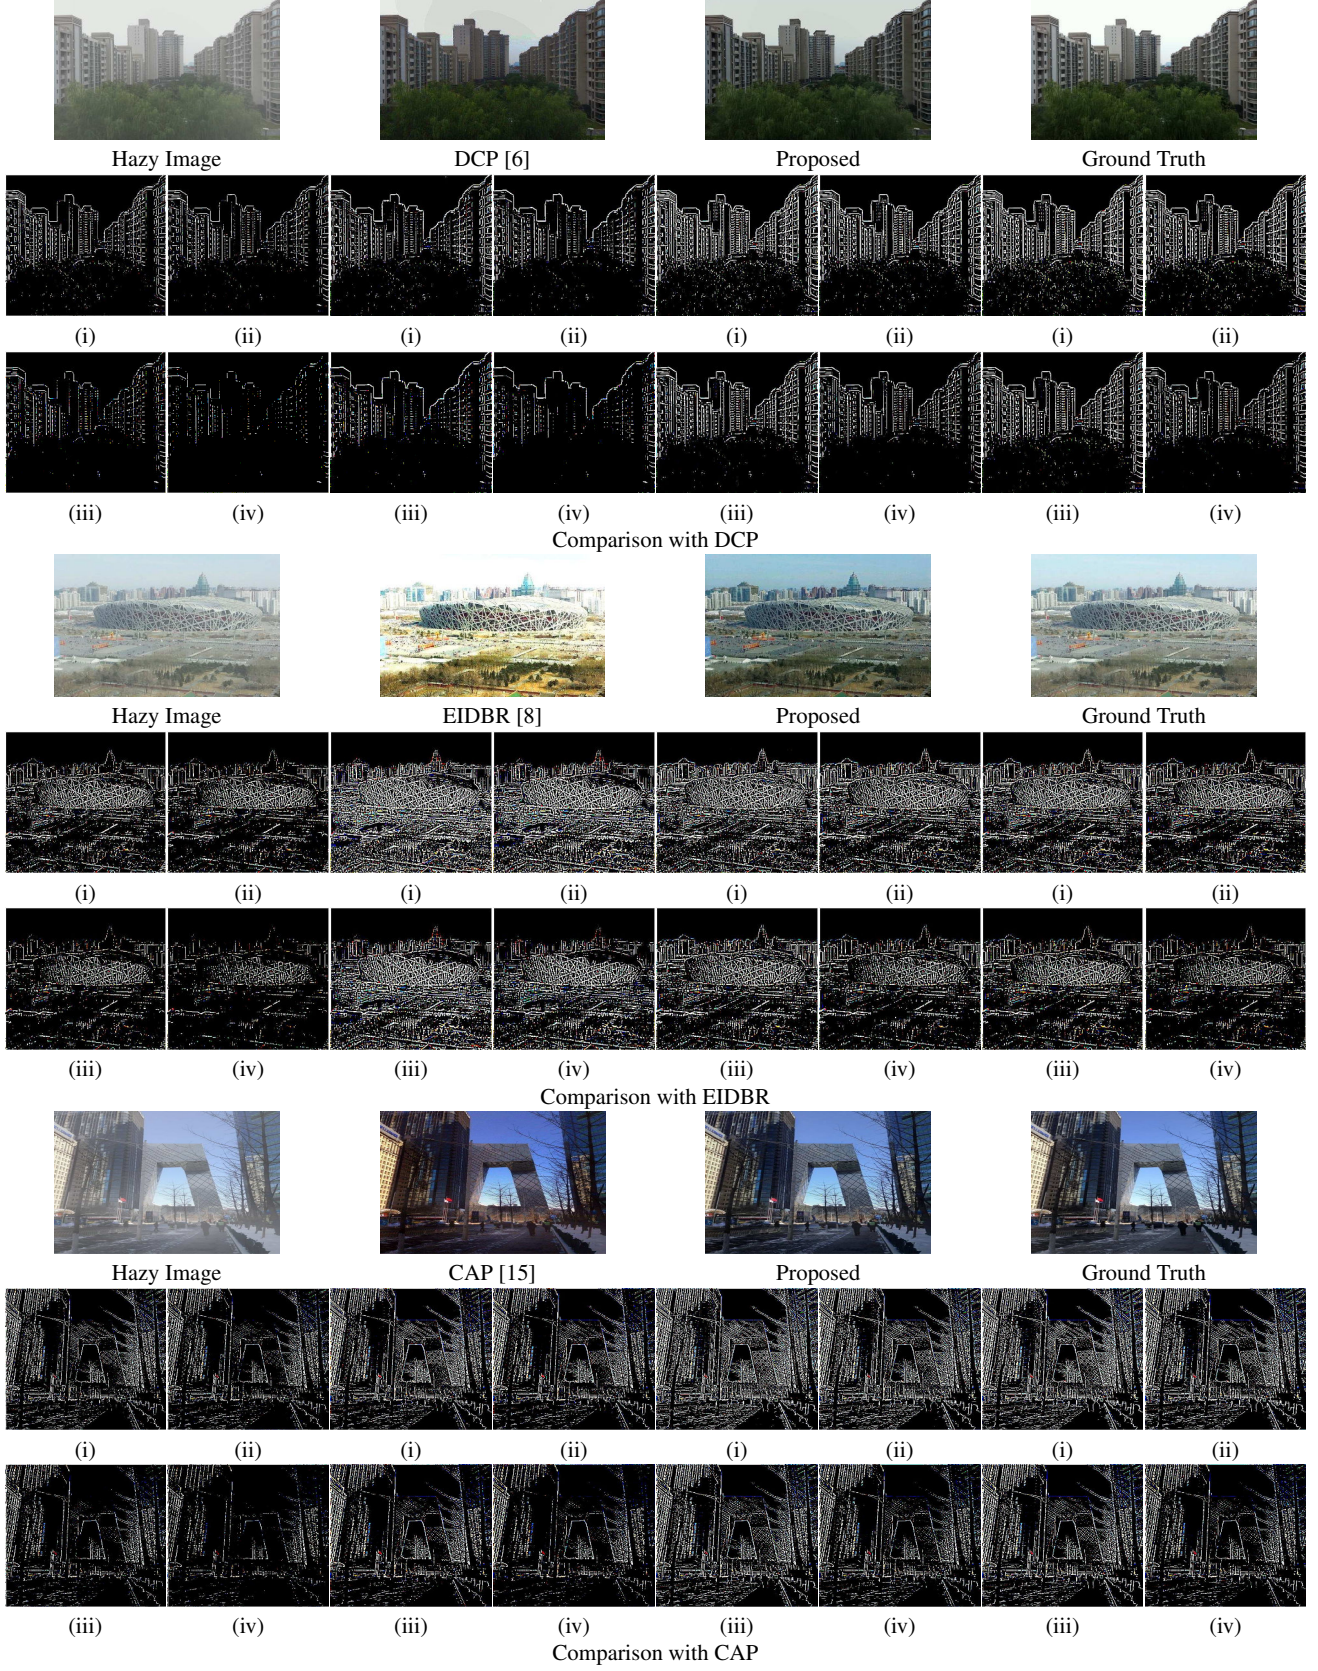

Figure 1. Sample Laplacians of Gaussian (LoG) filters of (I) Hazy, (II) Dehazed by using [6, 8, 15], (III) Proposed and (IV) Clean images. For each in I,II,III and IV, (i)  $G(\mathbf{m}, \mathbf{n}, k\sigma) - G(\mathbf{m}, \mathbf{n}, \sigma)$ , (ii)  $G(\mathbf{m}, \mathbf{n}, k^2\sigma) - G(\mathbf{m}, \mathbf{n}, k\sigma)$ , (iii)  $G(\mathbf{m}, \mathbf{n}, k^3\sigma) - G(\mathbf{m}, \mathbf{n}, k^2\sigma)$ , and (iv)  $G(\mathbf{m}, \mathbf{n}, k^4\sigma) - G(\mathbf{m}, \mathbf{n}, k^3\sigma)$ .

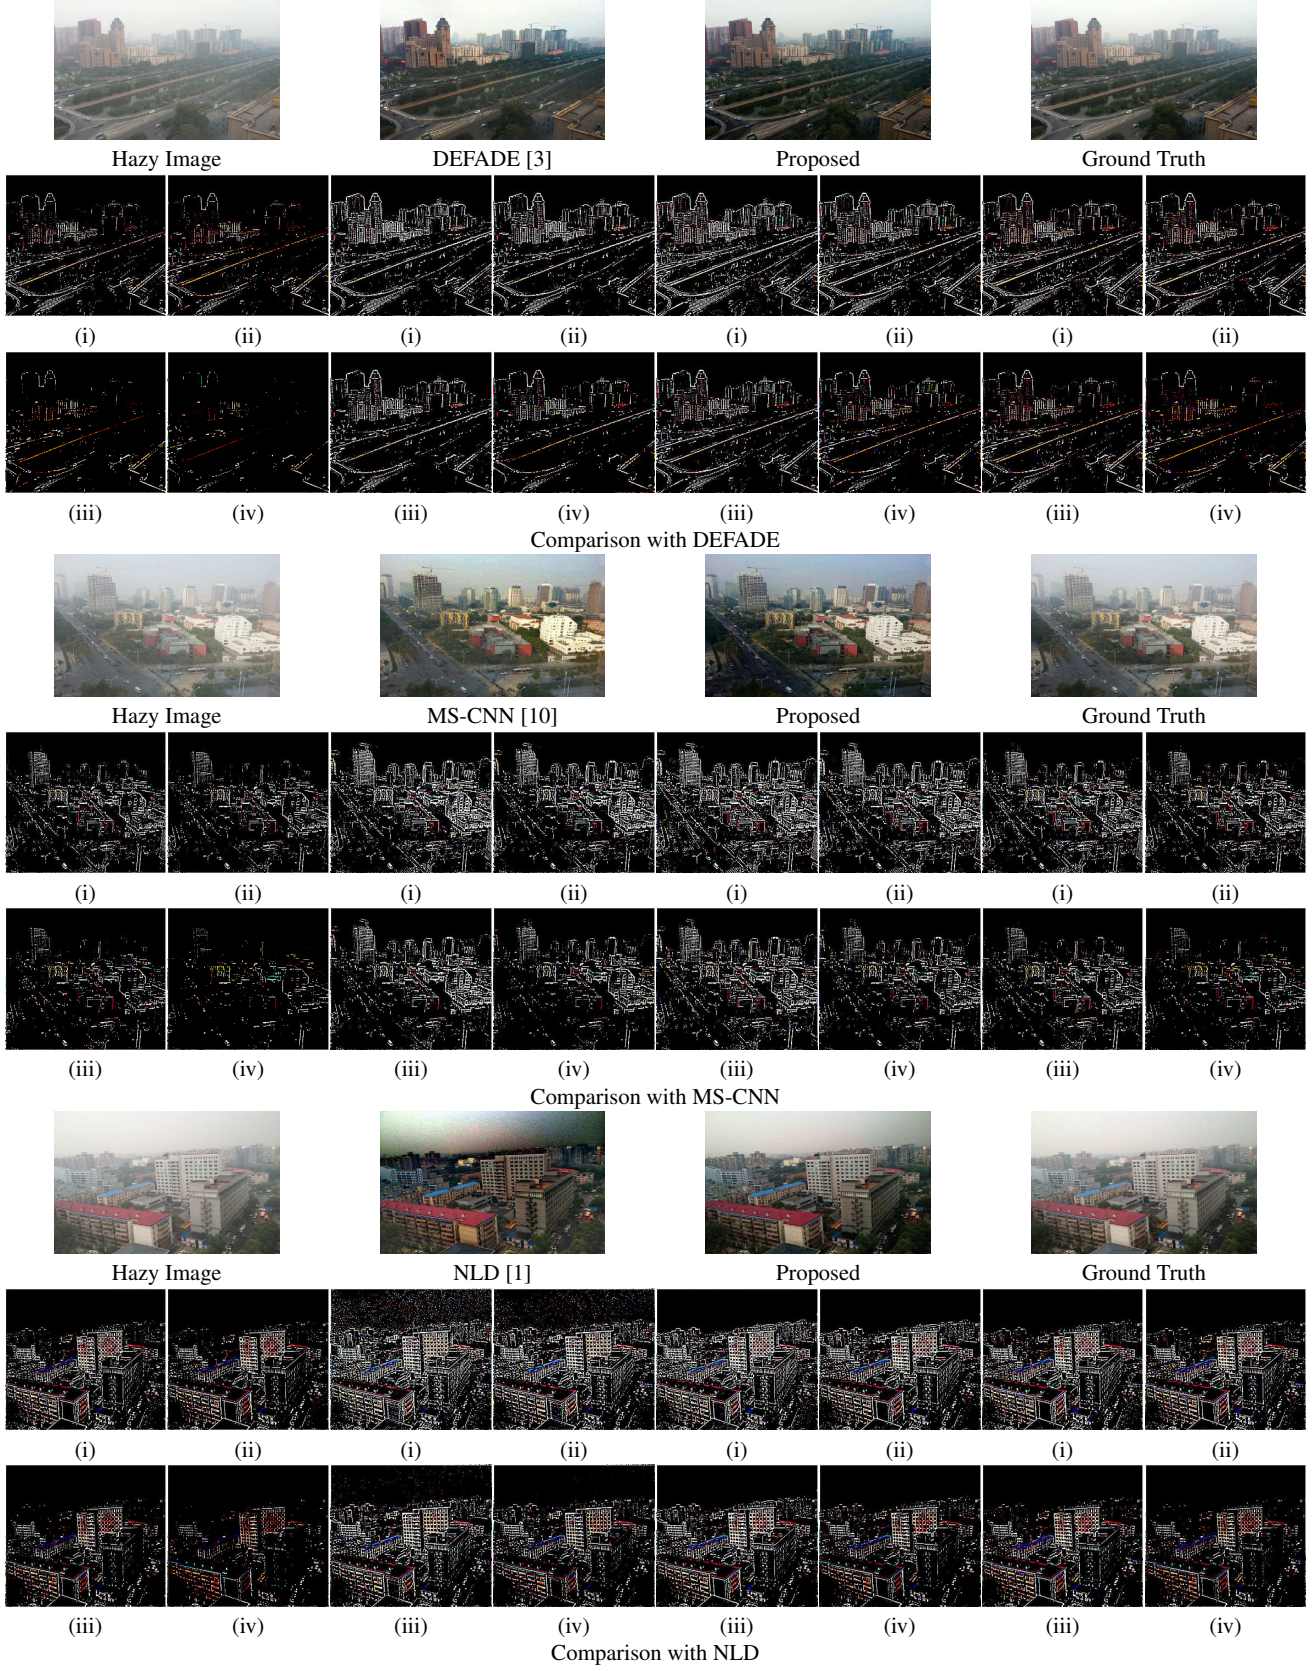

Figure 2. Sample Laplacians of Gaussian (LoG) filters of (I) Hazy, (II) Dehazed by using [3, 10, 1], (III) Proposed and (IV) Clean images. For each in I,II,III and IV, (i)  $G(\mathbf{m}, \mathbf{n}, k\sigma) - G(\mathbf{m}, \mathbf{n}, \sigma)$ , (ii)  $G(\mathbf{m}, \mathbf{n}, k^2\sigma) - G(\mathbf{m}, \mathbf{n}, k\sigma)$ , (iii)  $G(\mathbf{m}, \mathbf{n}, k^3\sigma) - G(\mathbf{m}, \mathbf{n}, k^2\sigma)$ , and (iv)  $G(\mathbf{m}, \mathbf{n}, k^4\sigma) - G(\mathbf{m}, \mathbf{n}, k^3\sigma)$ .

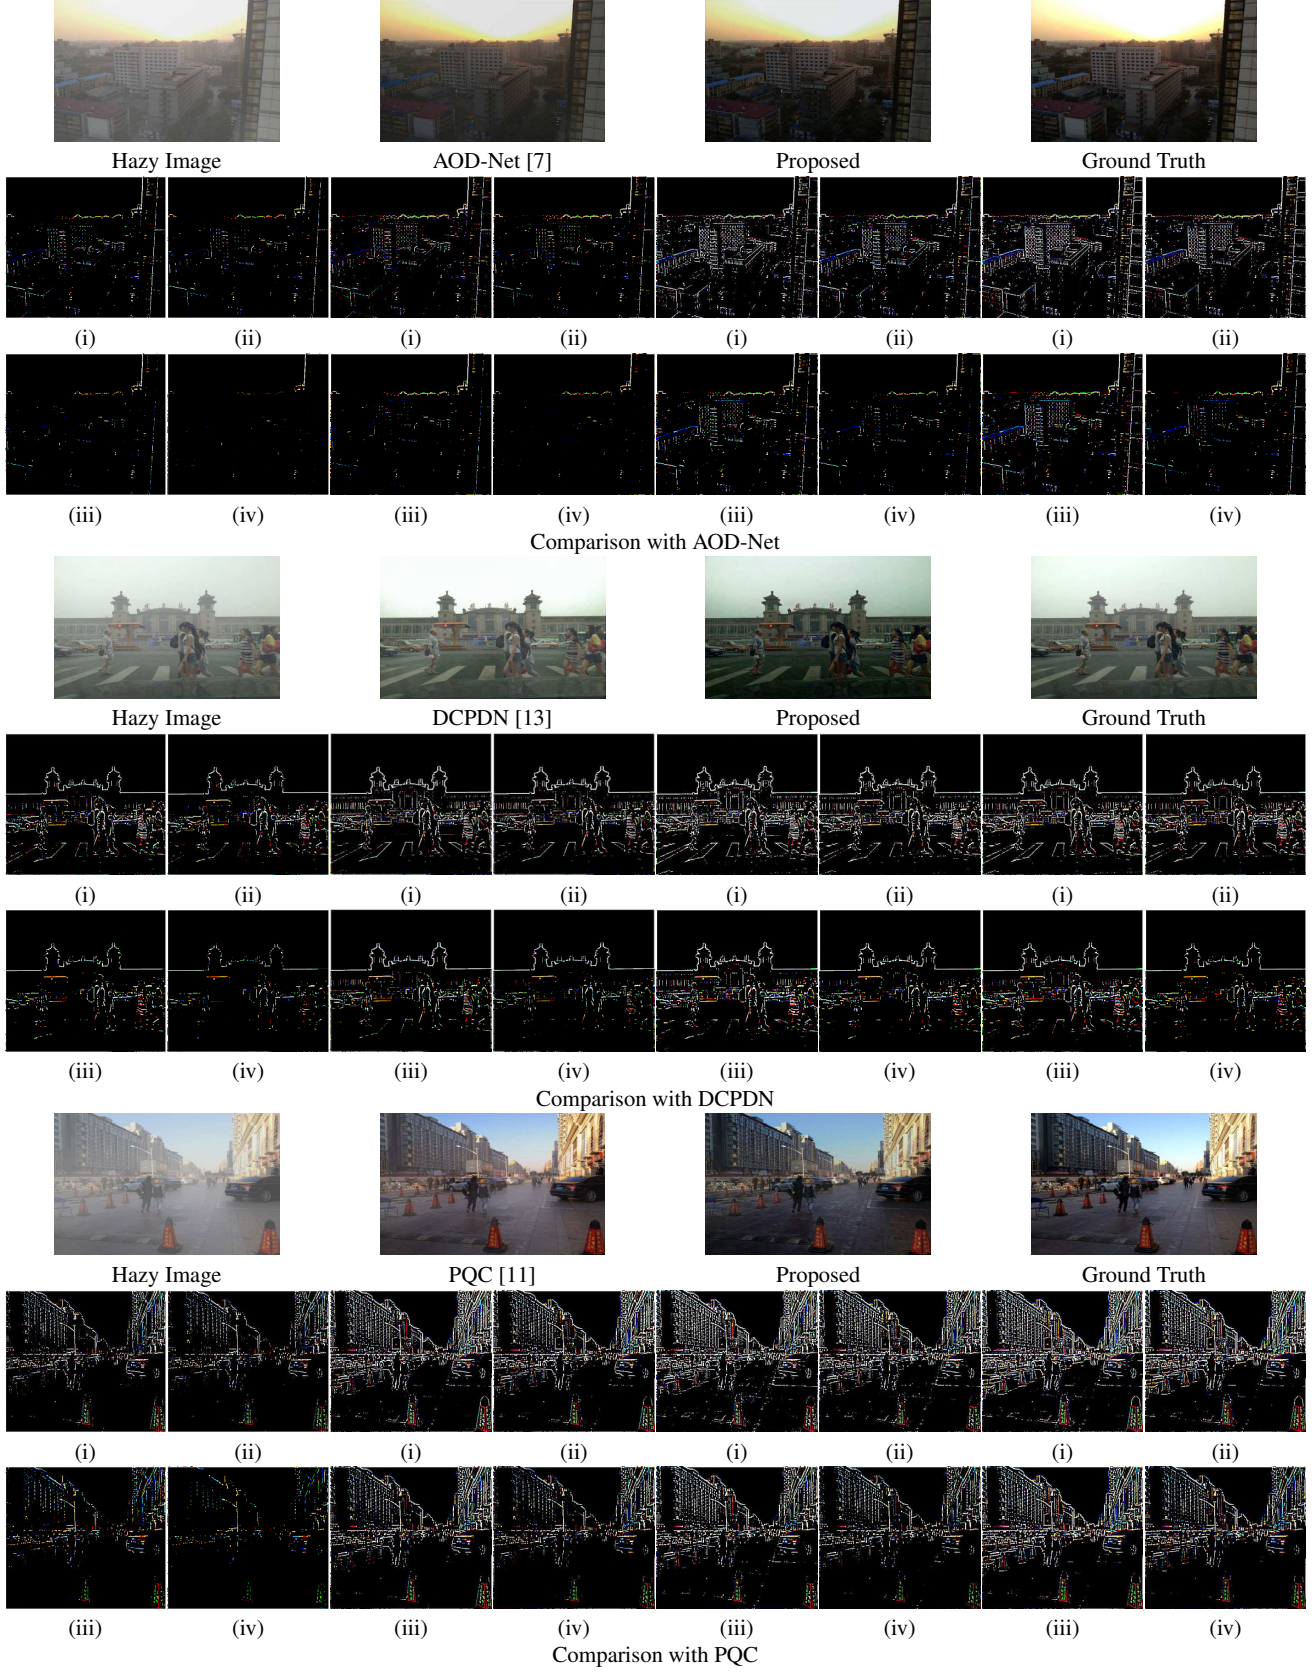

Figure 3. Sample Laplacians of Gaussian (LoG) filters of (I) Hazy, (II) Dehazed by using [7, 13, 11], (III) Proposed and (IV) Clean images. For each in I,II,III and IV, (i)  $G(\mathbf{m}, \mathbf{n}, k\sigma) - G(\mathbf{m}, \mathbf{n}, \sigma)$ , (ii)  $G(\mathbf{m}, \mathbf{n}, k^2\sigma) - G(\mathbf{m}, \mathbf{n}, k\sigma)$ , (iii)  $G(\mathbf{m}, \mathbf{n}, k^3\sigma) - G(\mathbf{m}, \mathbf{n}, k^2\sigma)$ , and (iv)  $G(\mathbf{m}, \mathbf{n}, k^4\sigma) - G(\mathbf{m}, \mathbf{n}, k^3\sigma)$ .

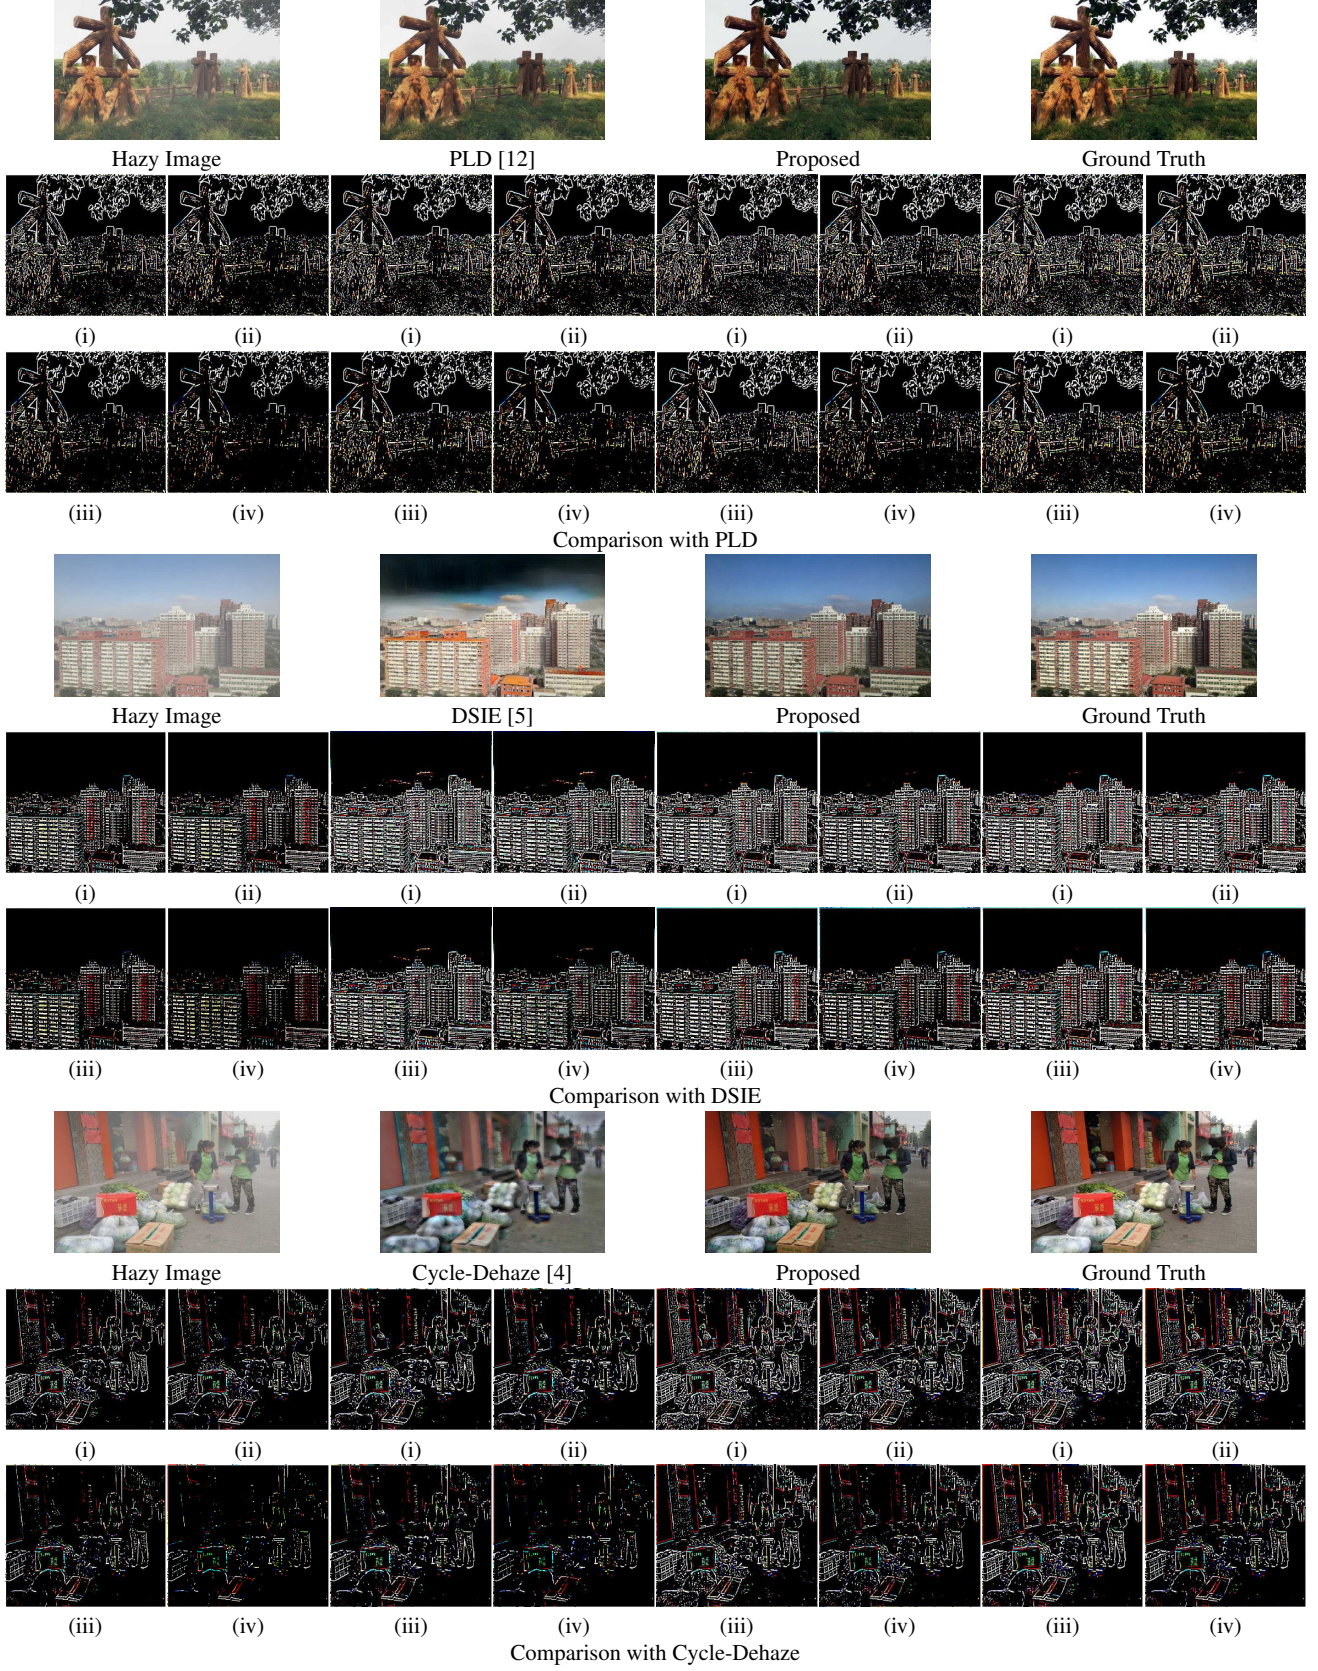

Figure 4. Sample Laplacians of Gaussian (LoG) filters of (I) Hazy, (II) Dehazed by using [12, 5, 4], (III) Proposed and (IV) Clean images. For each in I,II,III and IV, (i)  $G(\mathbf{m}, \mathbf{n}, k\sigma) - G(\mathbf{m}, \mathbf{n}, \sigma)$ , (ii)  $G(\mathbf{m}, \mathbf{n}, k^2\sigma) - G(\mathbf{m}, \mathbf{n}, k\sigma)$ , (iii)  $G(\mathbf{m}, \mathbf{n}, k^3\sigma) - G(\mathbf{m}, \mathbf{n}, k^2\sigma)$ , and (iv)  $G(\mathbf{m}, \mathbf{n}, k^4\sigma) - G(\mathbf{m}, \mathbf{n}, k^3\sigma)$ .

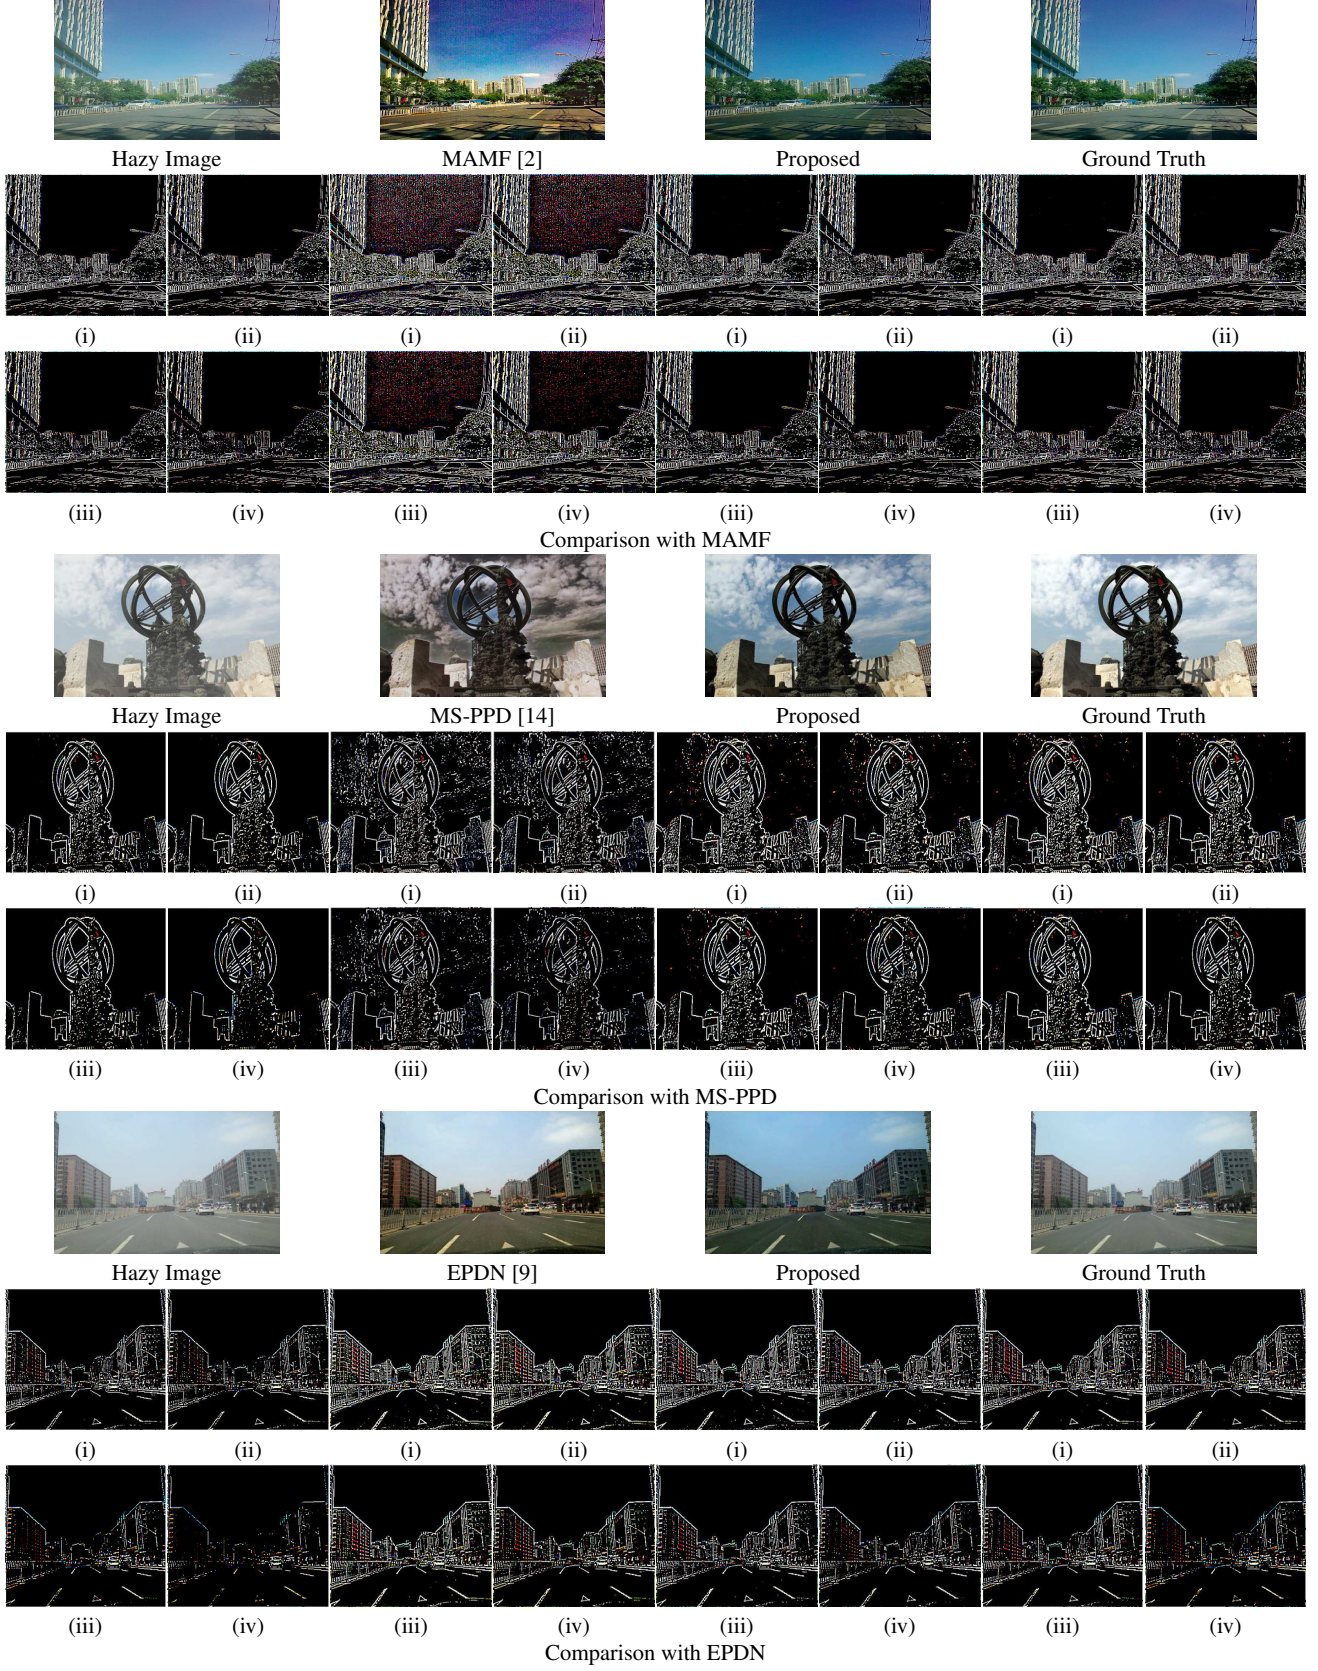

Figure 5. Sample Laplacians of Gaussian (LoG) filters of (I) Hazy, (II) Dehazed by using [2, 14, 9], (III) Proposed and (IV) Clean images. For each in I,II,III and IV, (i)  $G(\mathbf{m}, \mathbf{n}, k\sigma) - G(\mathbf{m}, \mathbf{n}, \sigma)$ , (ii)  $G(\mathbf{m}, \mathbf{n}, k^2\sigma) - G(\mathbf{m}, \mathbf{n}, k\sigma)$ , (iii)  $G(\mathbf{m}, \mathbf{n}, k^3\sigma) - G(\mathbf{m}, \mathbf{n}, k^2\sigma)$ , and (iv)  $G(\mathbf{m}, \mathbf{n}, k^4\sigma) - G(\mathbf{m}, \mathbf{n}, k^3\sigma)$ .

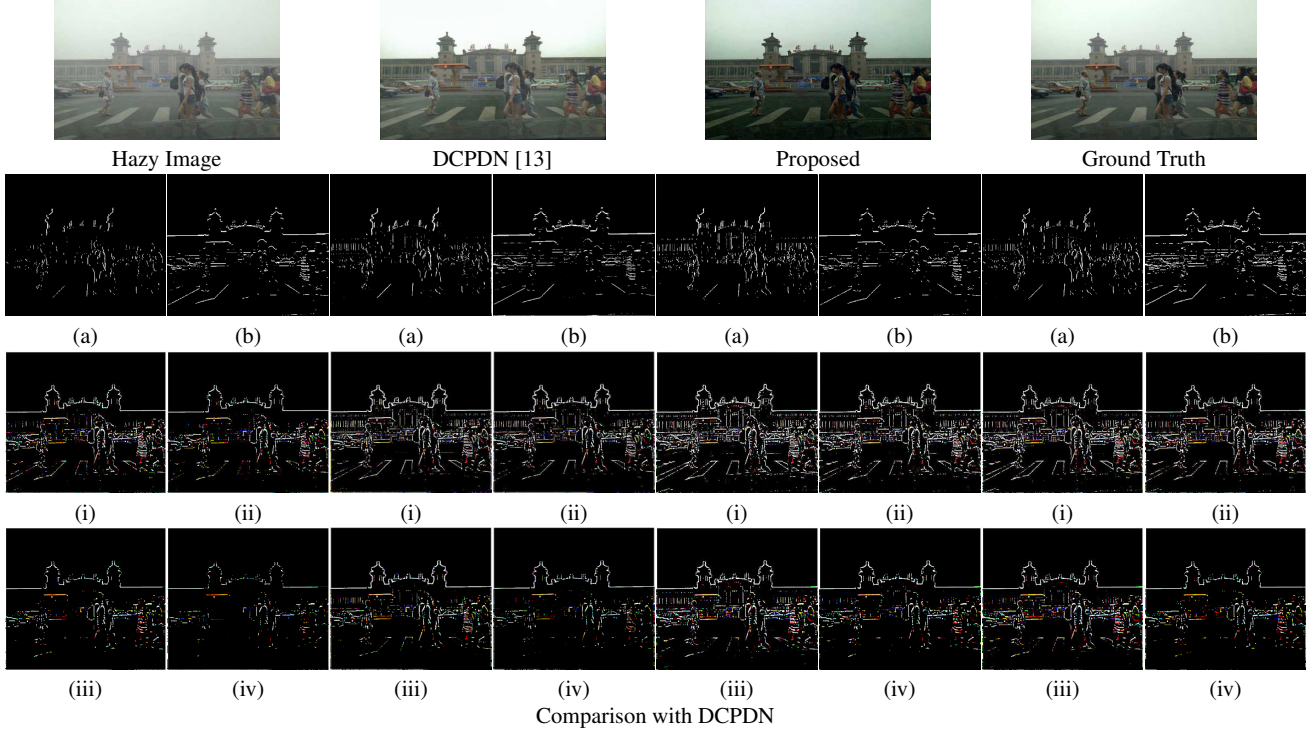

Figure 6. Edge-Gradient vs LoG Loss. Sample Laplacians of Gaussian (LoG) filters of (I) Hazy, (II) Dehazed by using [13], (III) Proposed and (IV) Clean images. For each in I,II,III and IV, (i)  $G(\mathbf{m}, \mathbf{n}, k\sigma) - G(\mathbf{m}, \mathbf{n}, \sigma)$ , (ii)  $G(\mathbf{m}, \mathbf{n}, k^2\sigma) - G(\mathbf{m}, \mathbf{n}, k\sigma)$ , (iii)  $G(\mathbf{m}, \mathbf{n}, k^3\sigma) - G(\mathbf{m}, \mathbf{n}, k^2\sigma)$ , and (iv)  $G(\mathbf{m}, \mathbf{n}, k^4\sigma) - G(\mathbf{m}, \mathbf{n}, k^3\sigma)$ . (a) variation along x-axis, (b) variation along y-axis.

### 3. Difference between Gradient and LoG losses

Zhang *et al.* [13] has used an image gradient loss for preserving the edges in the images. For this, an image gradient operator has been used. The 2D operator results in two gradient maps, one along the x-axis and the other one along the y-axis. To compare the LoG loss introduced in the submitted manuscript with the image gradient loss, we have calculated the 2D image gradients by using the *Sobel* operator, as shown in Figure 6. It can be observed that the LoG's retains more edgy details of an image than the conventional gradients. With the results provided in the manuscript, it can be observed that the introduced LoG loss is beneficial over the image gradient loss used in Zhang *et al.* [13].

### 4. Details of the adopted evaluation metrics

The proposed scheme has been compared with existing approaches using following 16 full-reference and noreference image quality metrics: Full-reference - SSIM which compares the images based on their structural information, PSNR, Visual information fidelity (VIF) which resembles the human visual system, Universal image quality index (UQI) which considers the loss of correlation in addition to luminance and contrast distortions, Learned perceptual image patch similarity (LPIPS) evaluates the difference

between images, Mean squared error (MSE), Multi-scale structural similarity (MS-SSIM), Feature similarity (FSIM) index which considers the low-level features of the images while differentiating, Color difference (CIEDE 2000) that estimates the color differences between two images, Haar wavelet-based perceptual similarity index (HaarPSI) that takes haar-wavelet decomposition of the images into account for calculating the difference, Gradient magnitude similarity deviation (GMSD) considers the image gradients and SpEED-QA: Spatial Efficient Entropic Differencing for Image and Video Quality computes the perceptually relevant image features efficiently. No-reference - Total variation error (TV-Error) calculates the total amount of noise present in an image, Naturalness image quality evaluator (NIQE) compares an image to a default model computed from images of natural scenes, Blind Image Quality Assessment: A Natural Scene Statistics Approach in the DCT Domain (BLINDS II) estimates the score using a simple probabilistic model, and Blind/referenceless image spatial quality evaluator (BRISQUE) compare an image to a default model computed from images of natural scenes with similar distortions.

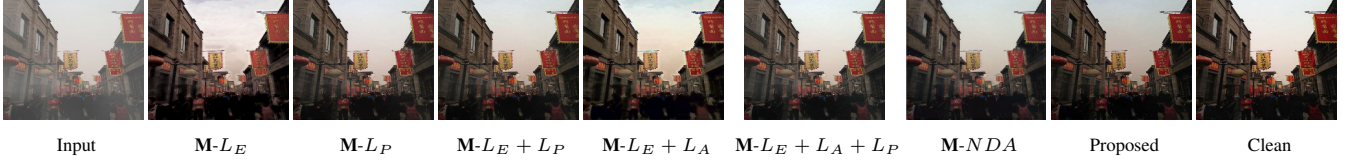

Figure 7. Qualitative demonstration of the ablation study presented in the manuscript.

## 5. Qualitative results of ablation study

Figure 7 demonstrates the qualitative analysis of the ablation study presented in the submitted manuscript.

## 6. Figure of merit (fom)

We have used 16 image quality assessment metrics to compare the proposed approach with the existing state-of-the-art schemes. However, to give a fair comparison, we have used the following figure of merit (*fom*) to give a final score to any method

$$Score = (0.6 \times \text{Best} + 0.4 \times \text{Second Best}) / \text{Total Metrics} \quad (1)$$

where, **Best** indicates the number of entries among all metrics with best score and **Second Best** indicates the number of entries among all metrics with second best score, "/" (out of) total number of metrics, for any method. For example, if a method has 4 entries with best scores and 3 entries with second best scores, then its final score becomes 3.6 out of ("") total number of metrics.

## 7. More synthetic results on SOTS.

Figures 8, 9, and 10 shows the qualitative comparison of the proposed scheme with existing methods on SOTS Outdoor images. Figures 11 and 12 shows the qualitative comparison of the proposed scheme with existing methods on SOTS Indoor images.

## 8. More real-world results.

Figures 13, 14, 15 and 16 shows the qualitative comparison of the proposed scheme with existing methods on the real-world hazy images.

## References

- [1] D. Berman, T. treibitz, and S. Avidan. Non-local image dehazing. In *The IEEE Conference on Computer Vision and Pattern Recognition (CVPR)*, June 2016.
- [2] Y. Cho, J. Jeong, and A. Kim. Model-assisted multiband fusion for single image enhancement and applications to robot vision. *IEEE Robotics and Automation Letters*, 3(4):2822–2829, Oct 2018.
- [3] L. K. Choi, J. You, and A. C. Bovik. Referenceless prediction of perceptual fog density and perceptual image defogging. *IEEE Transactions on Image Processing*, 24(11):3888–3901, Nov 2015.
- [4] D. Engin, A. Genç, and H. K. Ekenel. Cycle-dehaze: Enhanced cyclegan for single image dehazing. In *The IEEE Conference on Computer Vision and Pattern Recognition (CVPR) Workshops*, 2018.
- [5] T. Guo, X. Li, V. Cherukuri, and V. Monga. Dense scene information estimation network for dehazing. In *The IEEE Conference on Computer Vision and Pattern Recognition (CVPR) Workshops*, June 2019.
- [6] K. He, J. Sun, and X. Tang. Single image haze removal using dark channel prior. *IEEE Transactions on Pattern Analysis and Machine Intelligence*, 33(12):2341–2353, Dec 2011.
- [7] B. Li, X. Peng, Z. Wang, J. Xu, and D. Feng. Aod-net: All-in-one dehazing network. In *The IEEE International Conference on Computer Vision (ICCV)*, Oct 2017.
- [8] G. Meng, Y. Wang, J. Duan, S. Xiang, and C. Pan. Efficient image dehazing with boundary constraint and contextual regularization. In *The IEEE International Conference on Computer Vision (ICCV)*, December 2013.
- [9] Y. Qu, Y. Chen, J. Huang, and Y. Xie. Enhanced pix2pix dehazing network. In *The IEEE Conference on Computer Vision and Pattern Recognition (CVPR)*, June 2019.
- [10] W. Ren, S. Liu, H. Zhang, J. Pan, X. Cao, and M.-H. Yang. Single image dehazing via multi-scale convolutional neural networks. In *European Conference on Computer Vision*, 2016.
- [11] S. Santra, R. Mondal, and B. Chanda. Learning a patch quality comparator for single image dehazing. *IEEE Transactions on Image Processing*, 27(9):4598–4607, Sep. 2018.
- [12] D. Yang and J. Sun. Proximal dehaze-net: A prior learning-based deep network for single image dehazing. In V. Ferrari, M. Hebert, C. Sminchisescu, and Y. Weiss, editors, *Computer Vision – ECCV 2018*, pages 729–746, Cham, 2018. Springer International Publishing.
- [13] H. Zhang and V. M. Patel. Densely connected pyramid dehazing network. In *The IEEE Conference on Computer Vision and Pattern Recognition (CVPR)*, June 2018.
- [14] H. Zhang, V. Sindagi, and V. M. Patel. Multi-scale single image dehazing using perceptual pyramid deep network. In *2018 IEEE/CVF Conference on Computer Vision and Pattern Recognition Workshops (CVPRW)*, pages 1015–101509, June 2018.
- [15] Q. Zhu, J. Mai, and L. Shao. A fast single image haze removal algorithm using color attenuation prior. *IEEE Transactions on Image Processing*, 24(11):3522–3533, Nov 2015.

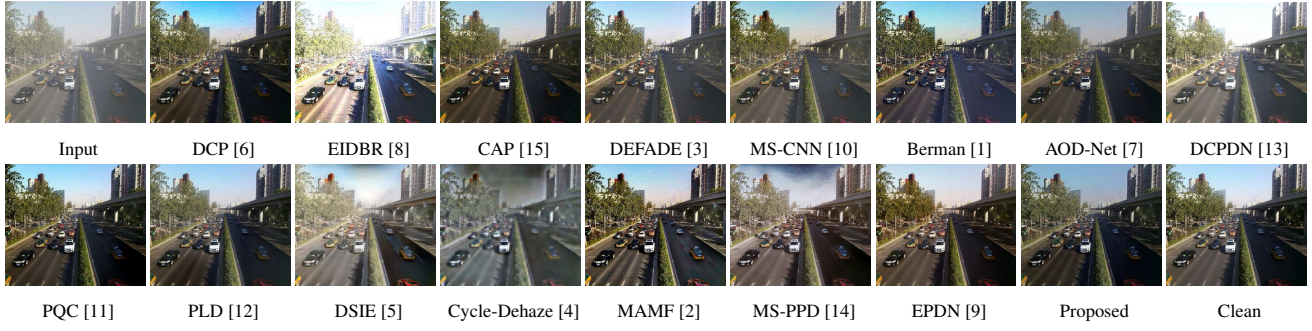

(a)

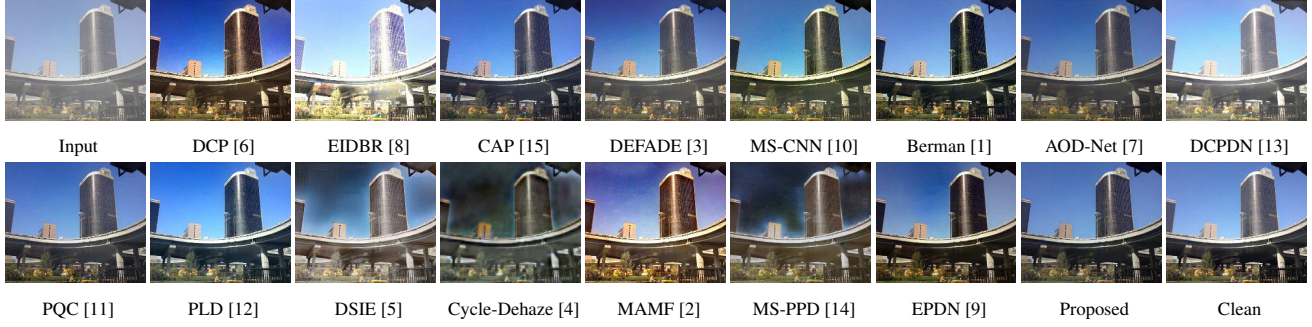

(b)

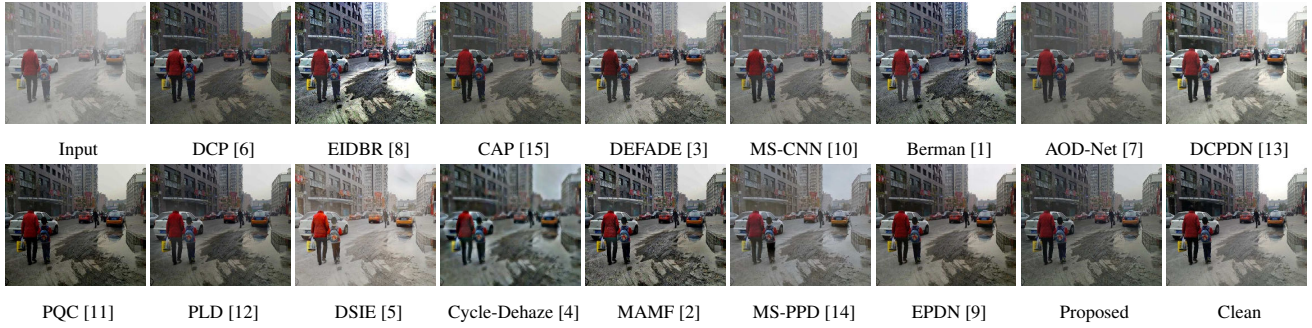

(c)

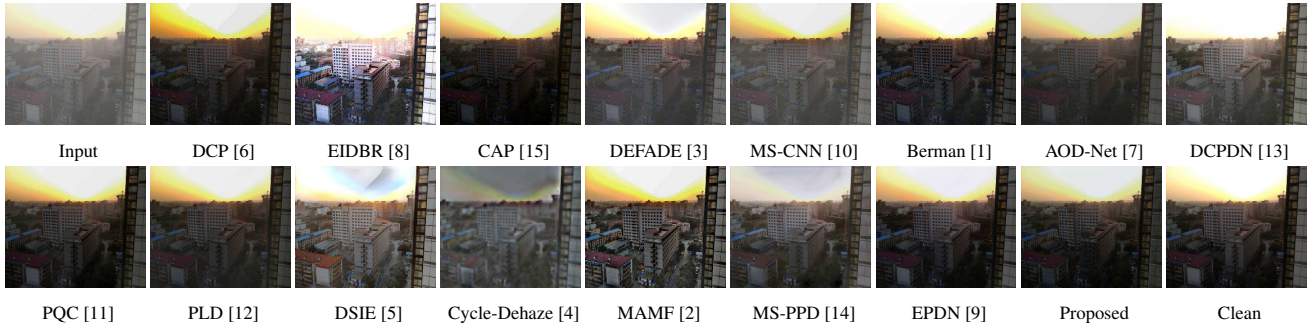

(d)

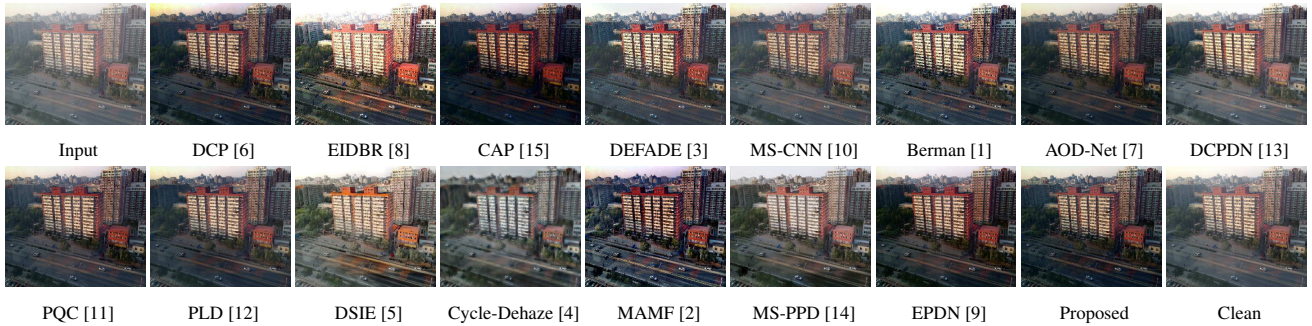

(e)

Figure 8. Qualitative comparison of the proposed model with existing schemes on SOTS Outdoor hazy images.

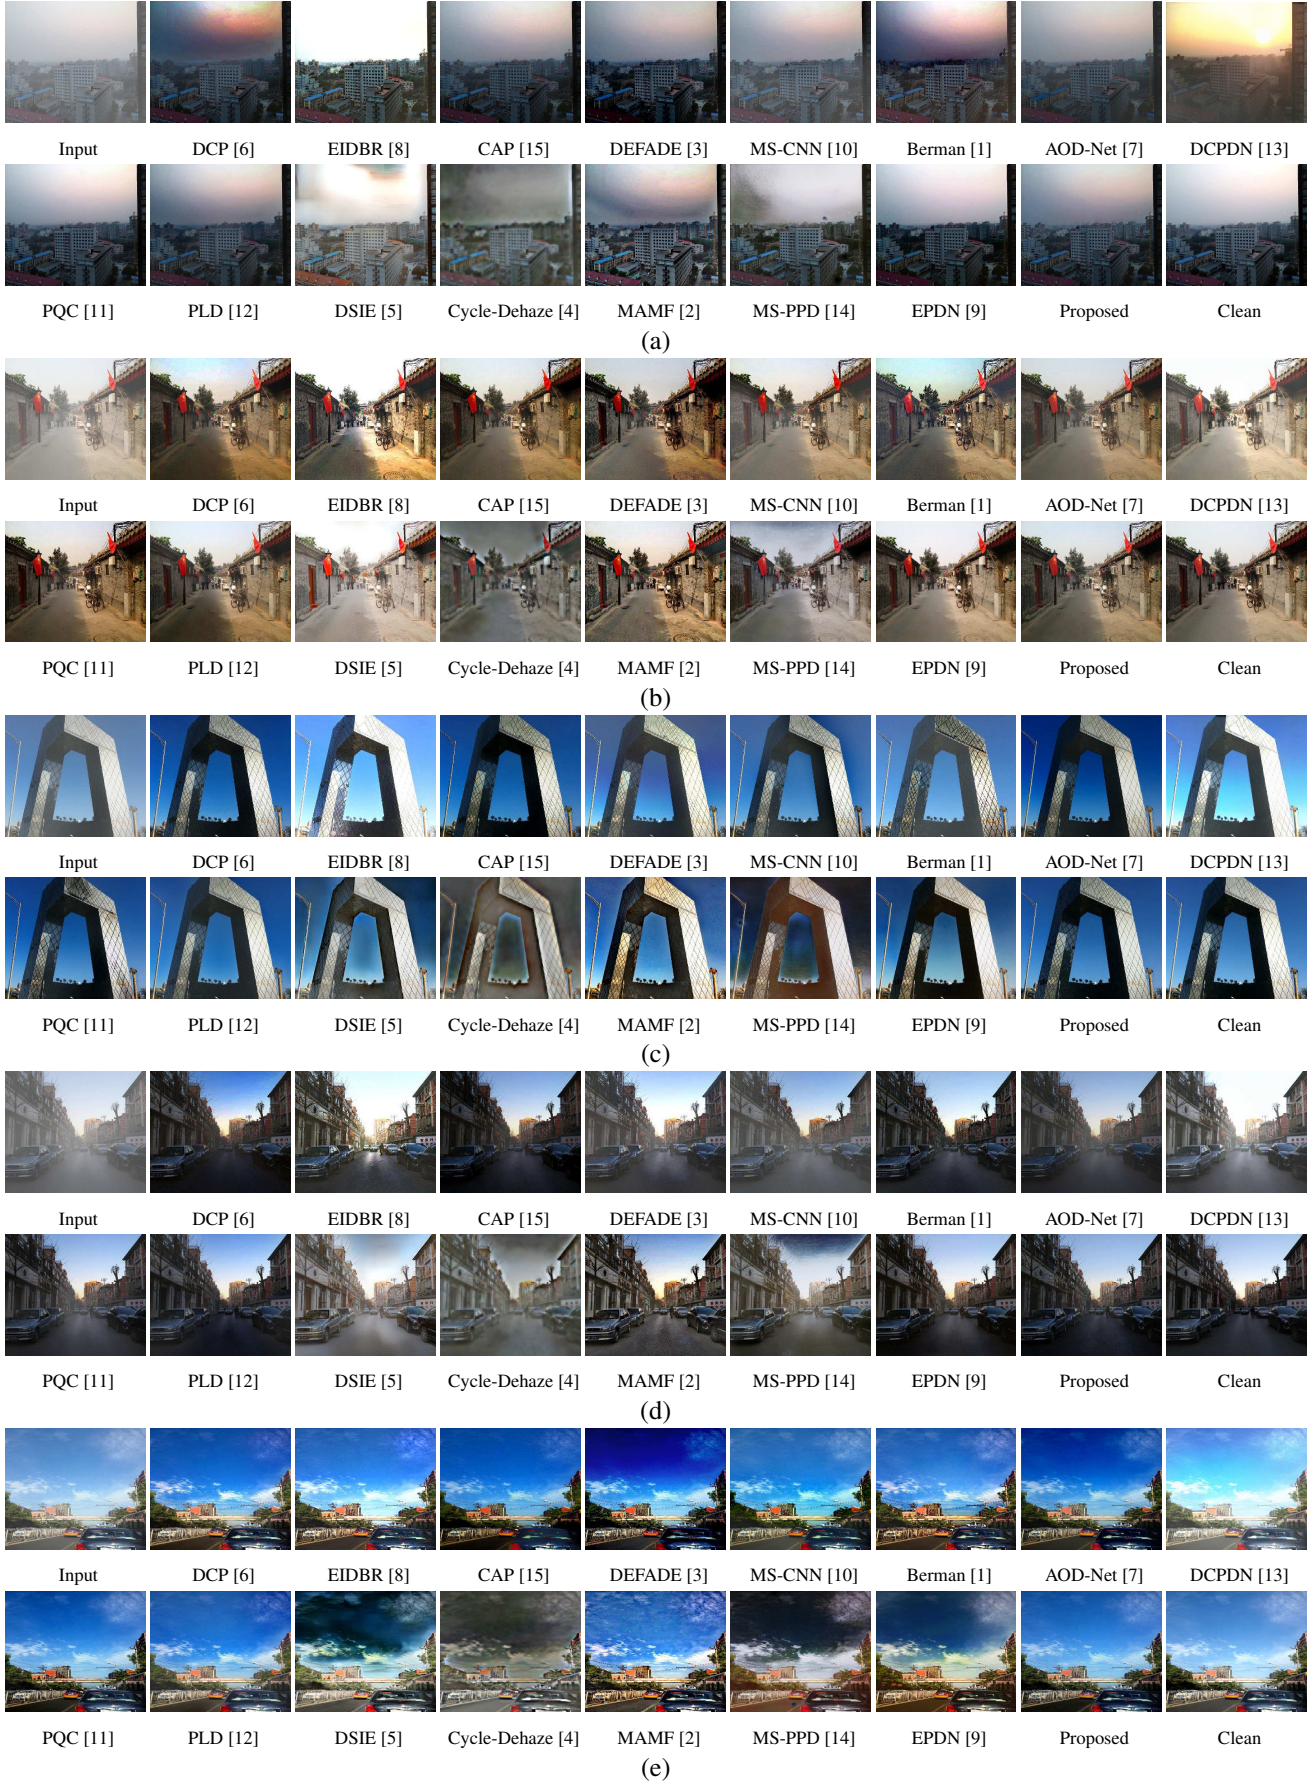

Figure 9. Qualitative comparison of the proposed model with existing schemes on SOTS Outdoor hazy images.

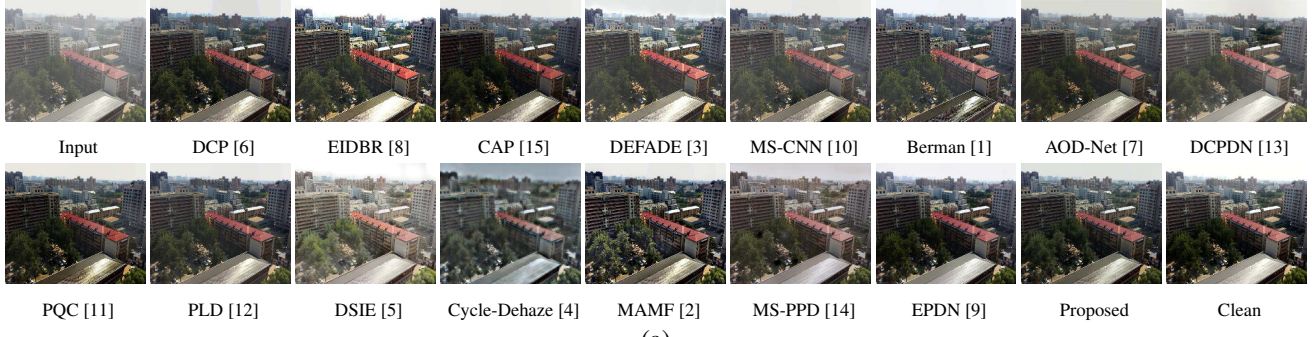

(a)

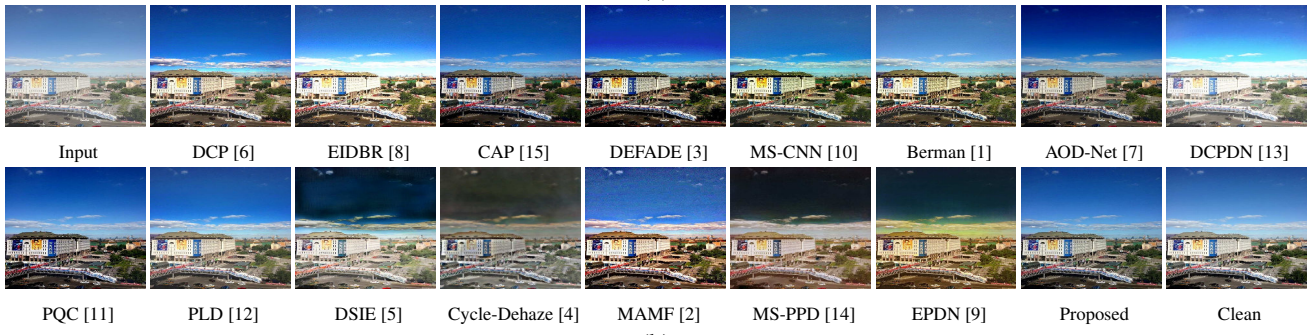

(b)

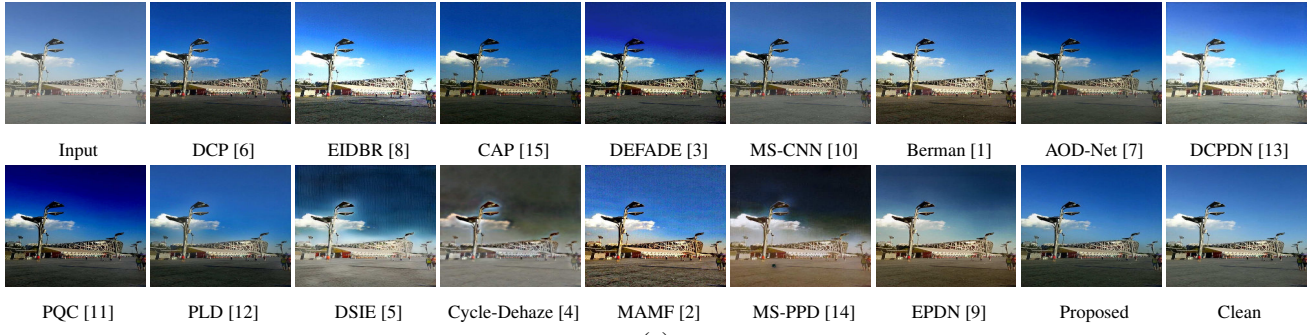

(c)

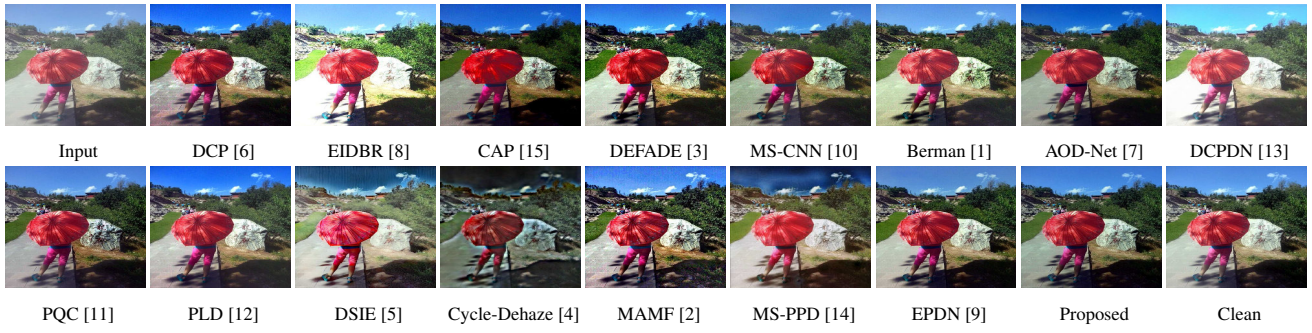

(d)

Figure 10. Qualitative comparison of the proposed model with existing schemes on SOTS Outdoor hazy images.

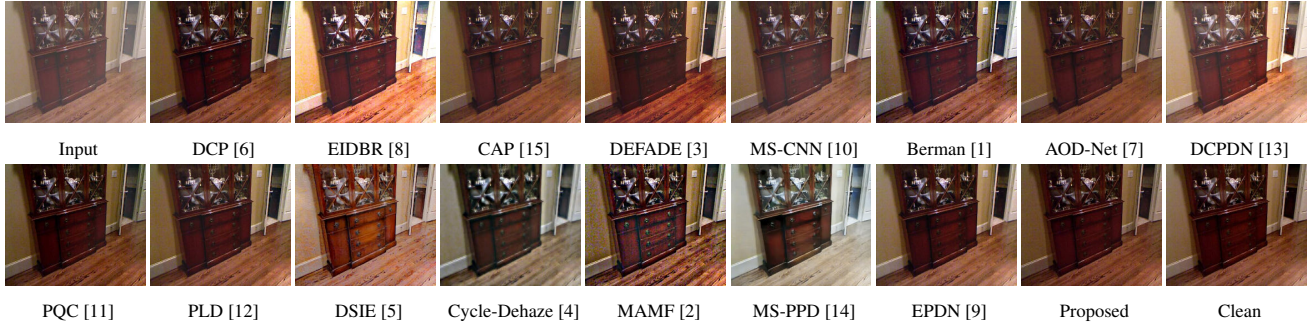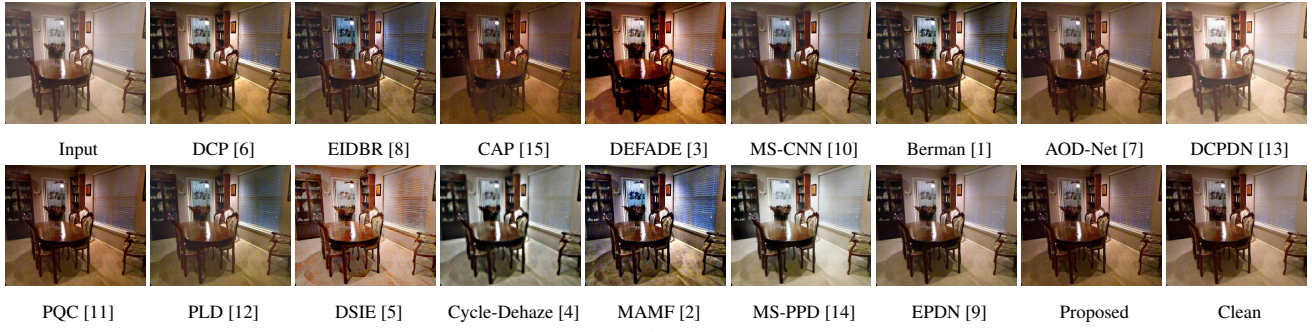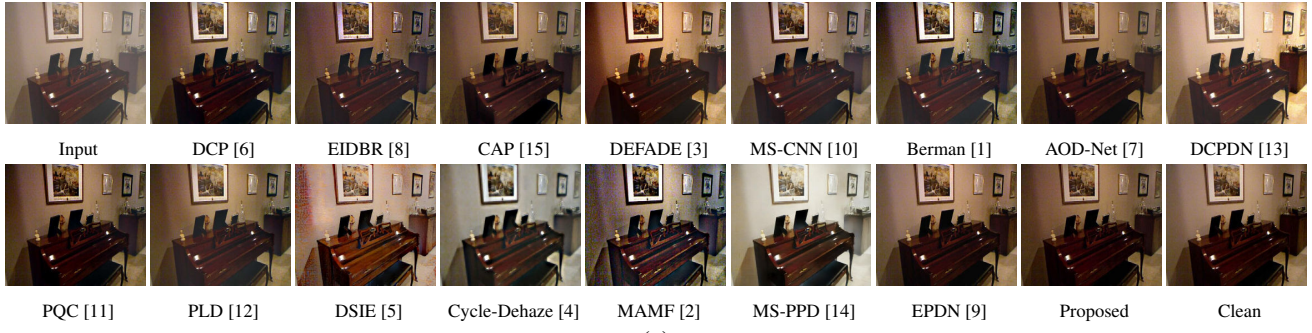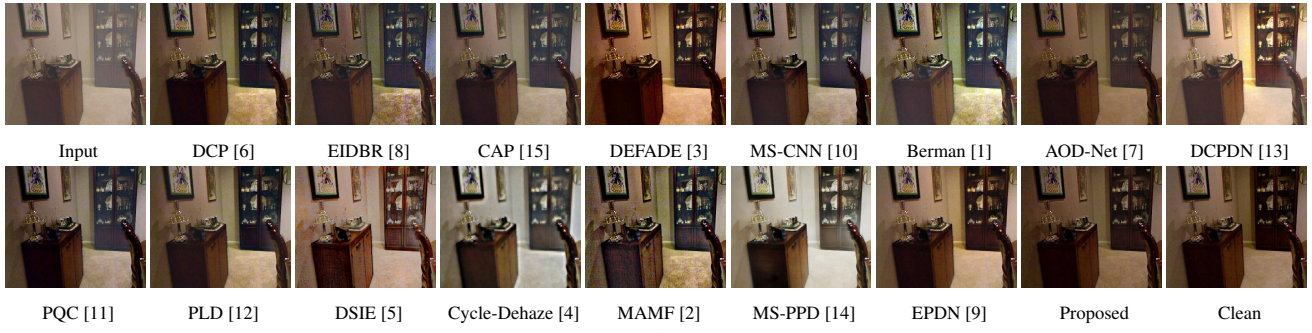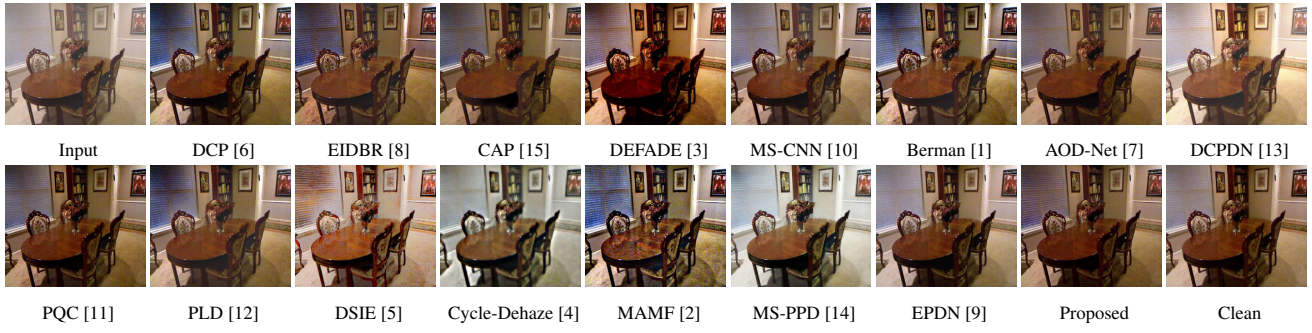

Figure 11. Qualitative comparison of the proposed model with existing schemes on SOTS Indoor hazy images.

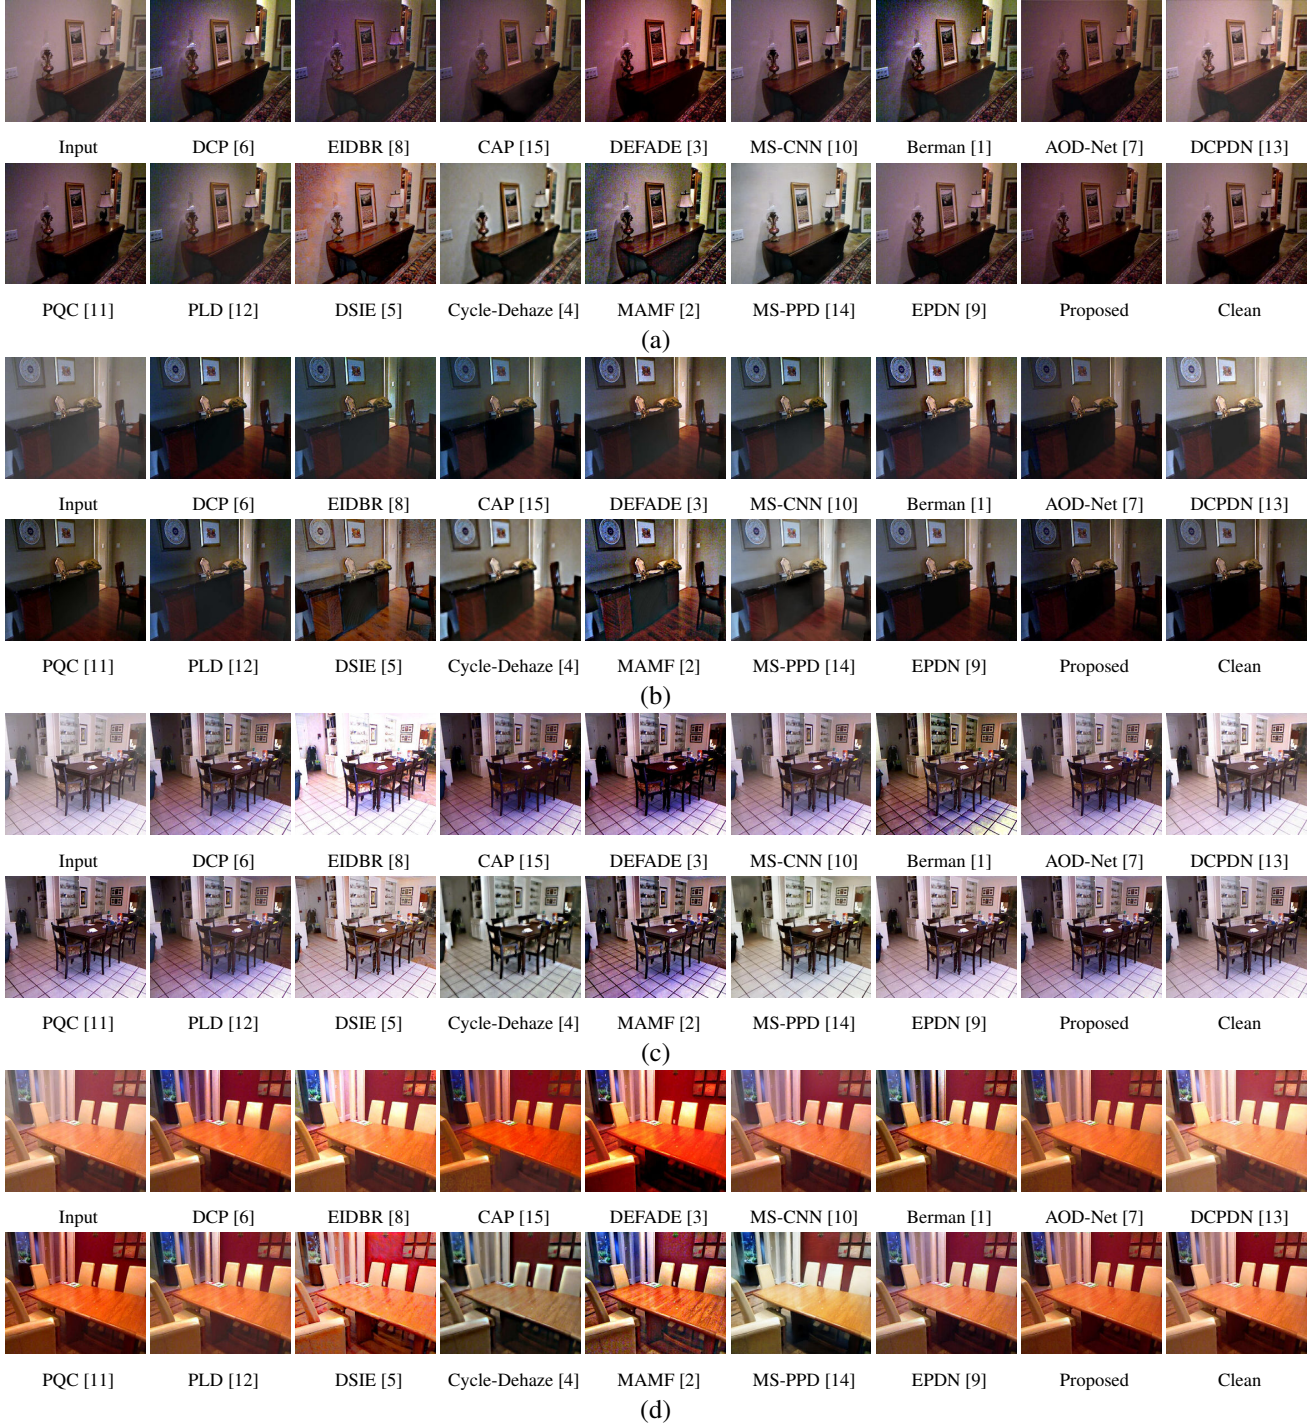

Figure 12. Qualitative comparison of the proposed model with existing schemes on SOTS Indoor hazy images.

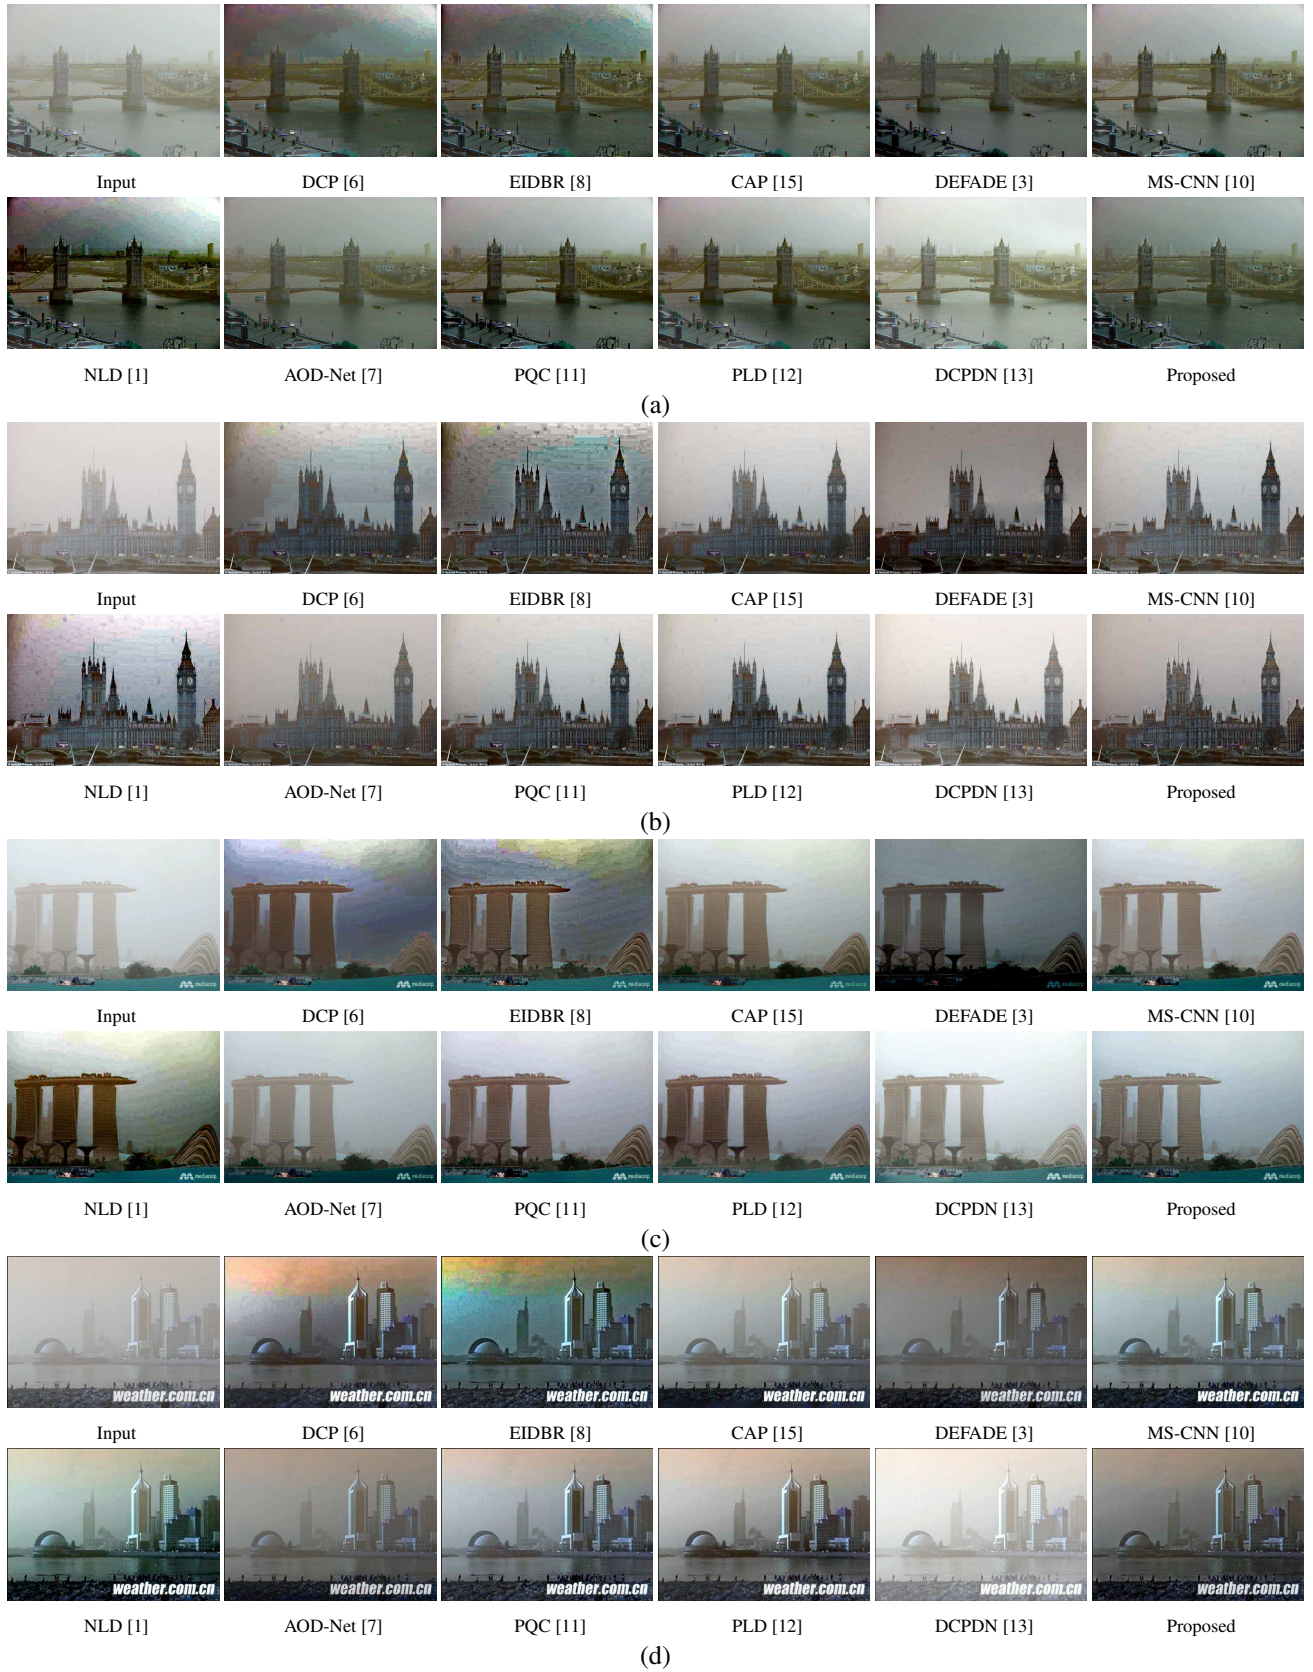

Figure 13. Qualitative comparison of the proposed model with existing schemes on real-world hazy images.

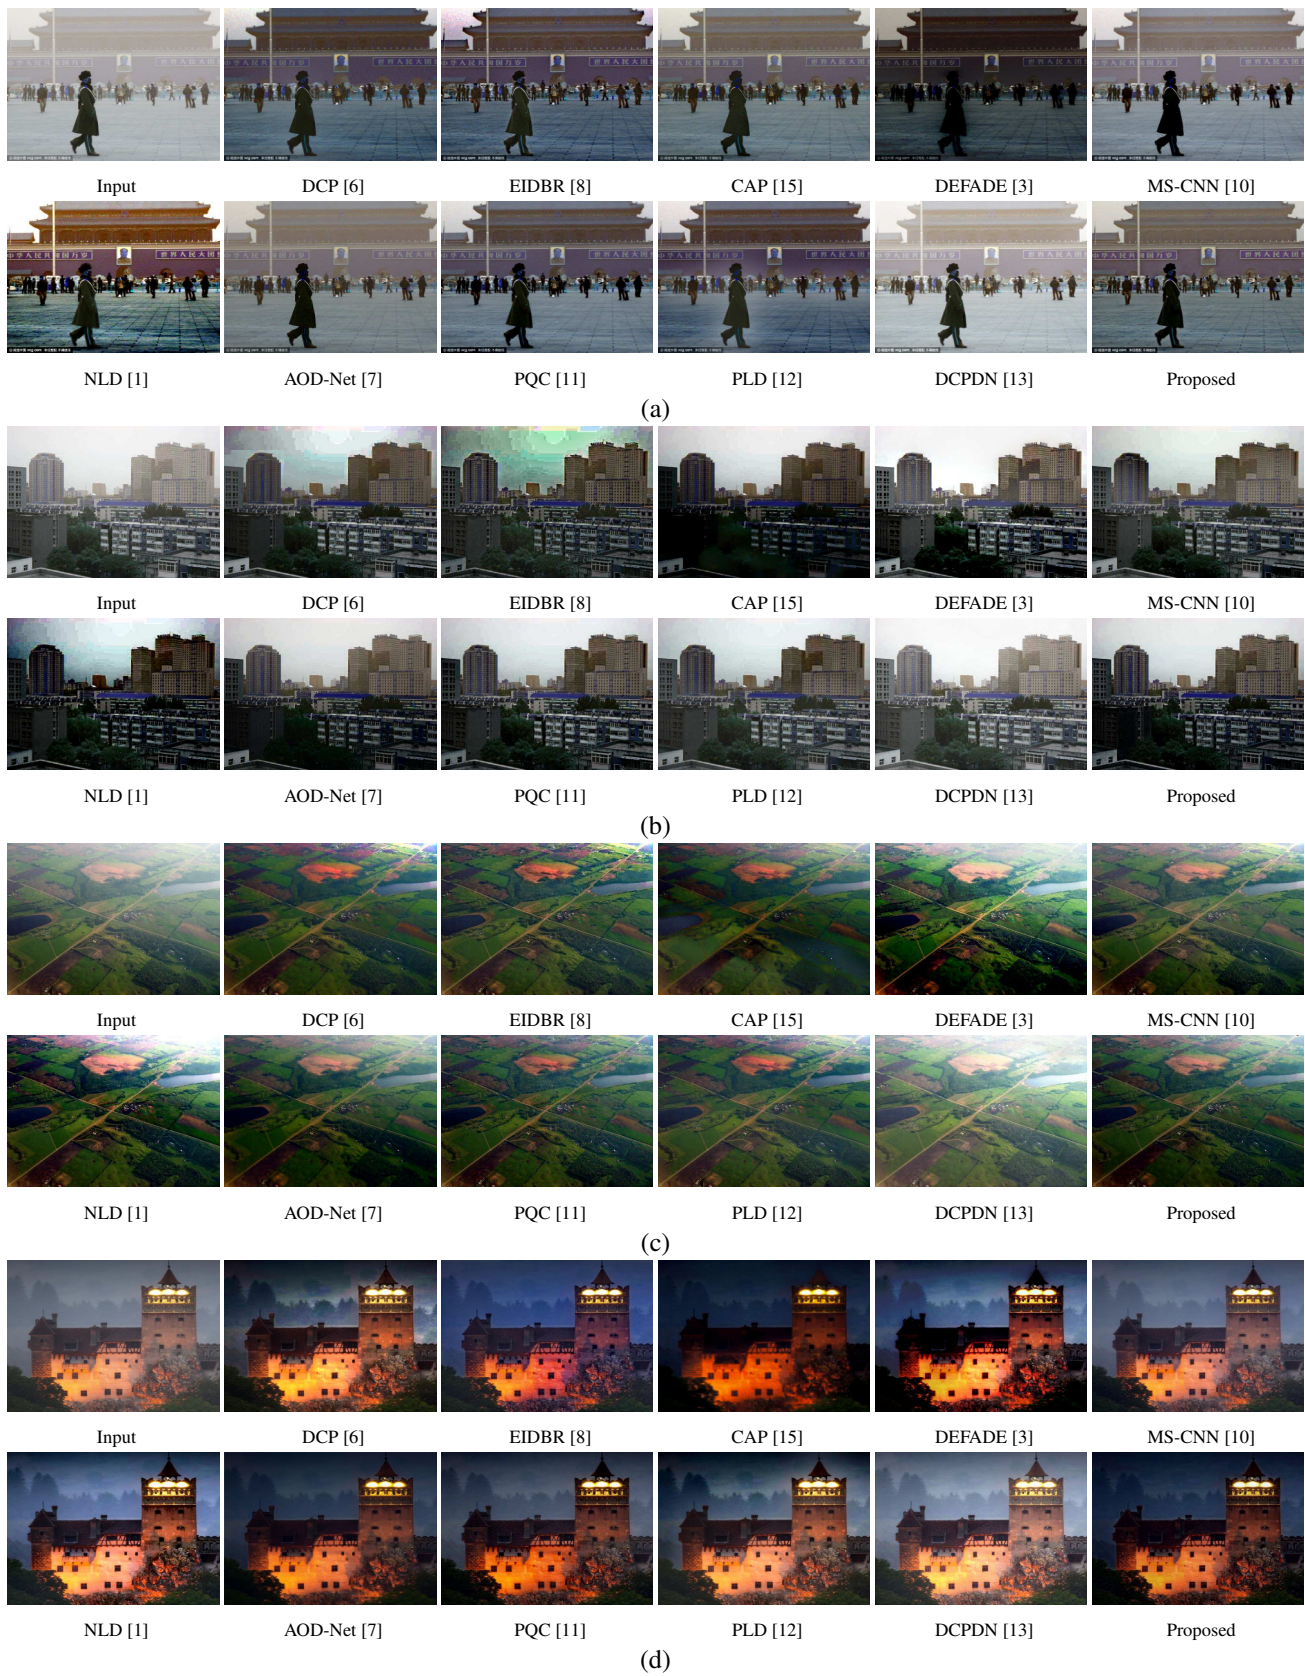

Figure 14. Qualitative comparison of the proposed model with existing schemes on real-world hazy images.

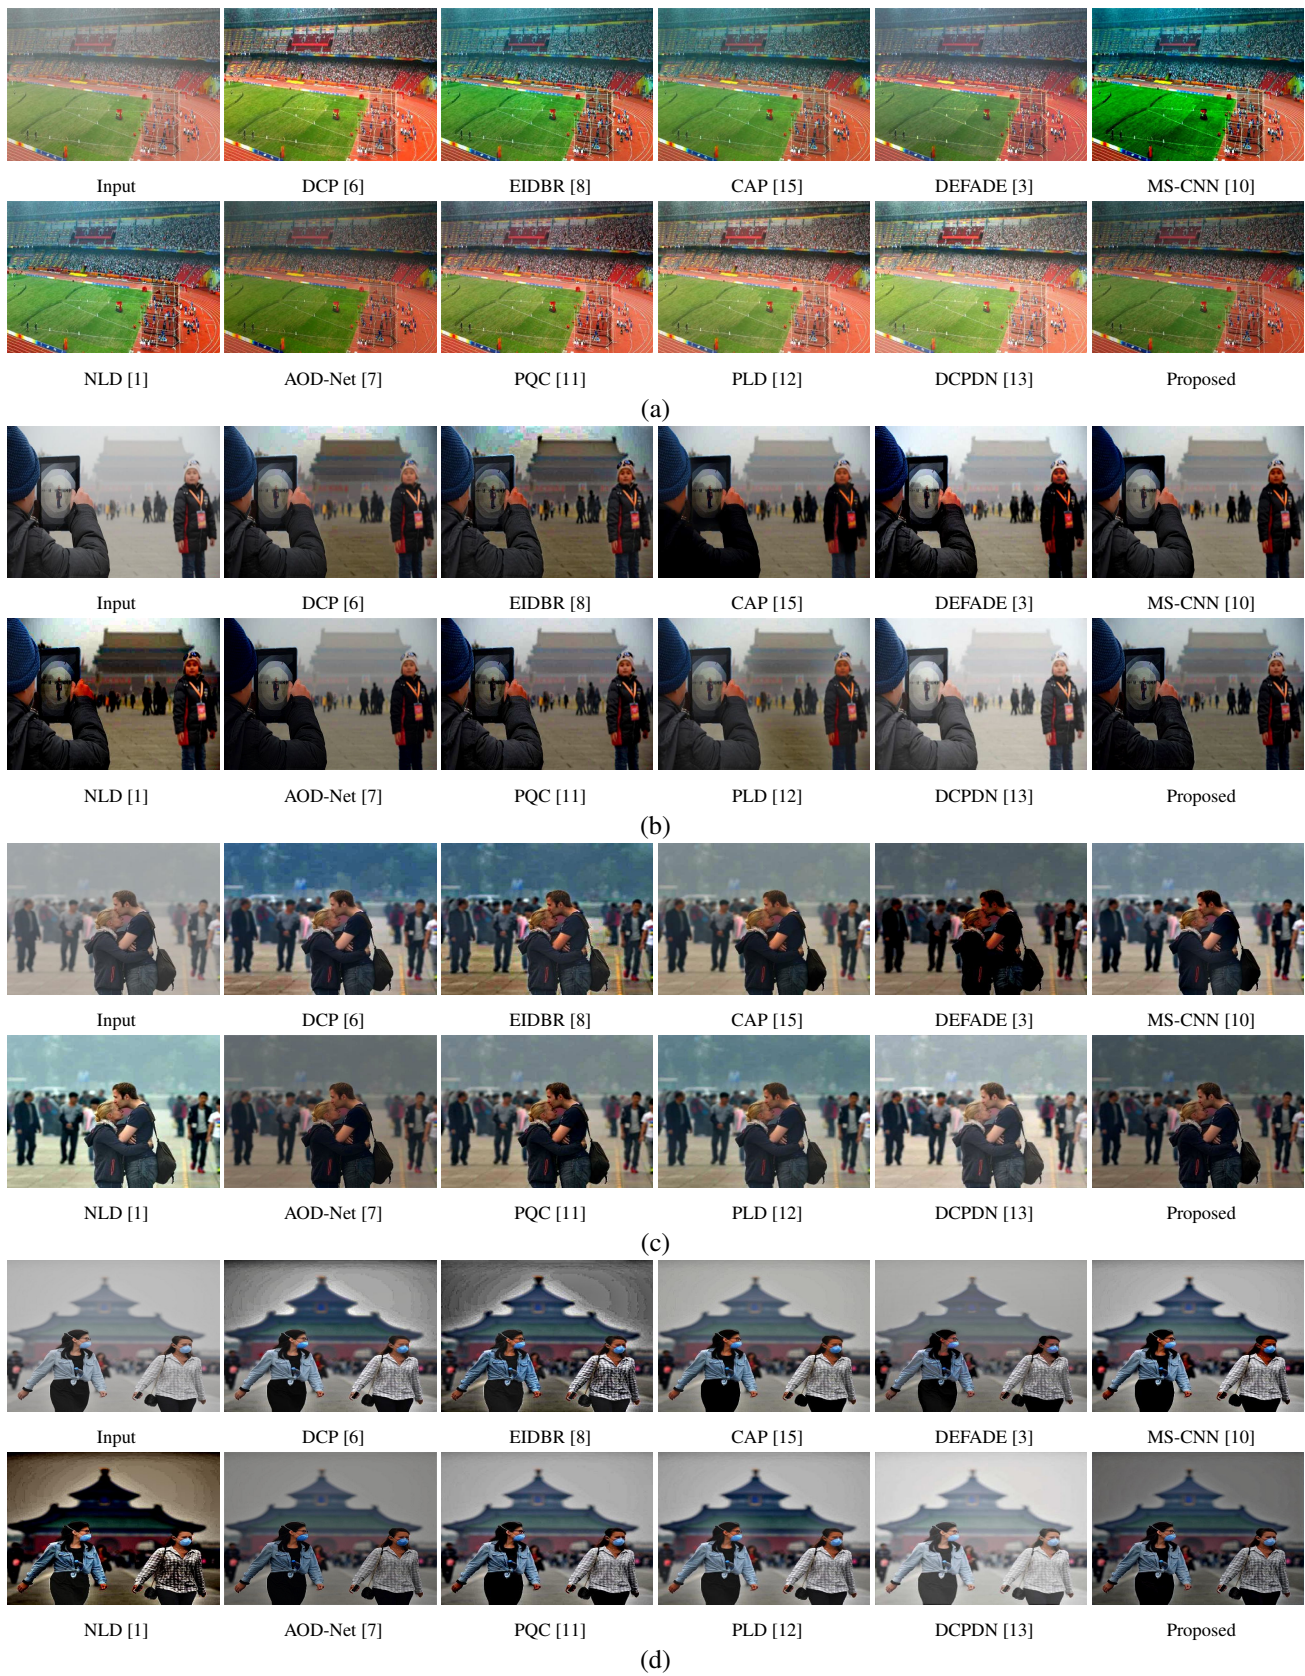

Figure 15. Qualitative comparison of the proposed model with existing schemes on real-world hazy images.

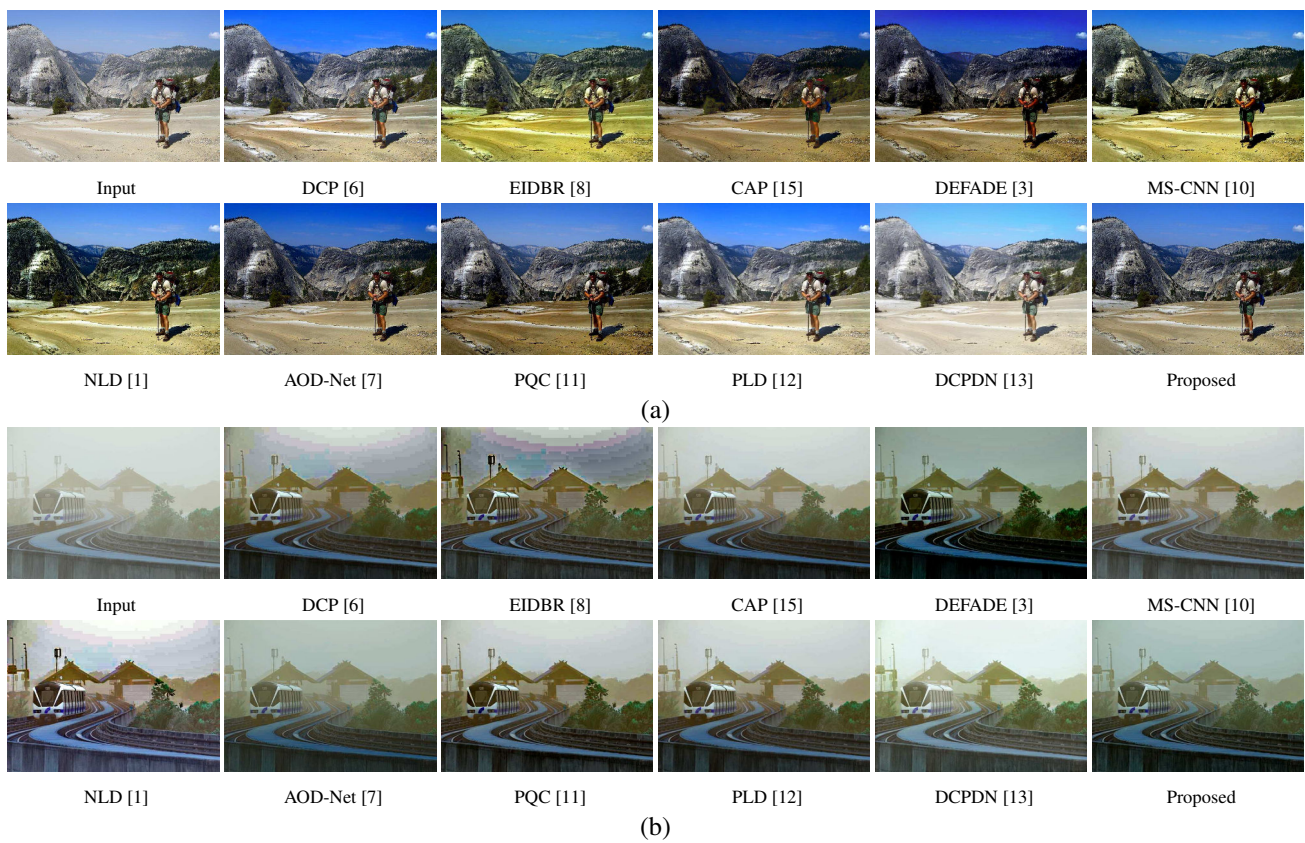

Figure 16. Qualitative comparison of the proposed model with existing schemes on real-world hazy images.
